# Supplementary material for: Biological and catalytic potential of sustainable low and high valent metal-Schiff base sulfonate salicylidene pincer complexes
Source: Royal Society of Chemistry journal article supplement (doi:10.1039/c9ra06816c), 2019-01-01
Supplement: c9ra06816c1.pdf [file c9ra06816c1.pdf]

## Biological and catalytic potential of sustainable low and high valent metal-Schiff base sulfonate salicylidene pincer complexes

Mohamed Shaker S. Adam<sup>1,2\*</sup>, Omar M. El-Hady<sup>2</sup>, Farman Ullah<sup>3</sup>

<sup>1</sup> Department of Chemistry, College of Science, King Faisal University, P.O. Box 380 Al Hufuf 31982 Al Hassa, Saudi Arabia.

<sup>2</sup> Chemistry Department, Faculty of Science, Sohag University, Sohag-82534, Egypt.

<sup>3</sup> Department of Chemistry, Winnipeg University 515 Portage Avenue, Winnipeg, Manitoba, R3B 2E9 Canada

\*corresponding author e-mail: madam@kfu.edu.sa; shakeradam61@yahoo.com (M.S.S. Adam).

**TABLE S1**

Activity index (%) of the antibacterial assay for HSaln ligand and MSaln complexes.

| Compound              | Activity index (%)            |                           |                                |
|-----------------------|-------------------------------|---------------------------|--------------------------------|
|                       | Serratia<br>Marcescence (-ve) | Escherichia coli<br>(-ve) | Staphylococcus aureus<br>(+ve) |
| HSaln                 | 25.00                         | 21.62                     | 30.43                          |
| VOSaln                | 90.00                         | 91.89                     | 91.30                          |
| VOSaln-Ph             | 75.00                         | 78.38                     | 78.26                          |
| MnSaln                | 85.00                         | 89.19                     | 86.96                          |
| MoO <sub>2</sub> Saln | 82.50                         | 86.49                     | 82.61                          |
| UO <sub>2</sub> Saln  | 95.00                         | 94.59                     | 95.65                          |

**TABLE S2**

Activity index (%) of antifungal assay for HSaln ligand and MSaln complexes.

| Compound              | Activity index (%)  |                       |                        |
|-----------------------|---------------------|-----------------------|------------------------|
|                       | Candida<br>albicans | Aspergillus<br>flavus | Trichophyton<br>Rubrum |
| HSaln                 | 18.92               | 32.00                 | 35.48                  |
| VOSaln                | 78.38               | 76.00                 | 80.65                  |
| VOSaln-Ph             | 91.89               | 92.00                 | 93.55                  |
| MnSaln                | 89.19               | 88.00                 | 90.32                  |
| MoO <sub>2</sub> Saln | 86.49               | 84.00                 | 87.09                  |
| UO <sub>2</sub> Saln  | 97.30               | 96.00                 | 96.77                  |

**Table S3**

Cytotoxic activity (IC<sub>50</sub>) of HSaln ligand and its MSaln complexes various Colon carcinoma cells, (HCT-116 cell line), hepatic cellular carcinoma cells (HepG-2) and breast carcinoma cells (MCF-7).

| Compound              | IC <sub>50</sub> (μg μL <sup>-1</sup> ) |            |            |
|-----------------------|-----------------------------------------|------------|------------|
|                       | HCT-116                                 | MCF-7      | HepG-2     |
| HSaln ligand          | 111.50±0.14                             | 85.70±0.23 | 93.20±0.15 |
| MnSaln                | 23.50±0.12                              | 14.20±0.12 | 17.50±0.17 |
| VOSaln-Ph             | 35.60±0.21                              | 24.90±0.13 | 28.90±0.15 |
| VOSaln                | 29.20±0.13                              | 18.50±0.11 | 21.30±0.12 |
| MoO <sub>2</sub> Saln | 33.10±0.15                              | 21.30±0.16 | 25.40±0.18 |
| UO <sub>2</sub> Saln  | 17.70±0.19                              | 9.60±0.10  | 11.60±0.13 |
| Vinblastine standard  | 13.30±0.11                              | 4.12±0.14  | 7.50±0.10  |

**NMR spectral data of HSaln ligand:**

<sup>1</sup>H NMR (DMSO-*d*<sub>6</sub>, 400 MHz): δ 6.50 (t, <sup>3</sup>*J* = 6.9 and 7.2 Hz, 1H), 6.74 (d, <sup>3</sup>*J* = 8.2 Hz, 1H), 6.94 (dd, <sup>3</sup>*J* = 8.0 and 8.3 Hz, 1H), 7.22 (t, <sup>3</sup>*J* = 7.0 and 7.4 Hz, 1H), 7.70 (dd, <sup>3</sup>*J* = 7.7 Hz, 2H), 7.92 (s, 1H), 10.26 (s, 1H, phenolic-OH), 10.82 ppm (s br, 1H, CH=N).

<sup>13</sup>C NMR (100 MHz, DMSO-*d*<sub>6</sub>, dept-135): δ 110.18 (C<sub>q</sub>), 115.05 (CH), 116.83 (CH), 116.96 (CH), 121.48 (CH), 126.92 (CH), 131.61 (CH), 134.20 (CH), 140.72 (C<sub>q</sub>), 151.94 (C<sub>q</sub>), 161.15 (C<sub>q</sub>), 169.99 (C<sub>q</sub>), 192.11 ppm (CH, CH=N).

SSA-3  
proton\_su DMSO (C:\nmr-data) Student 16

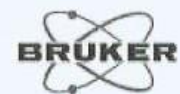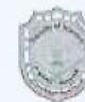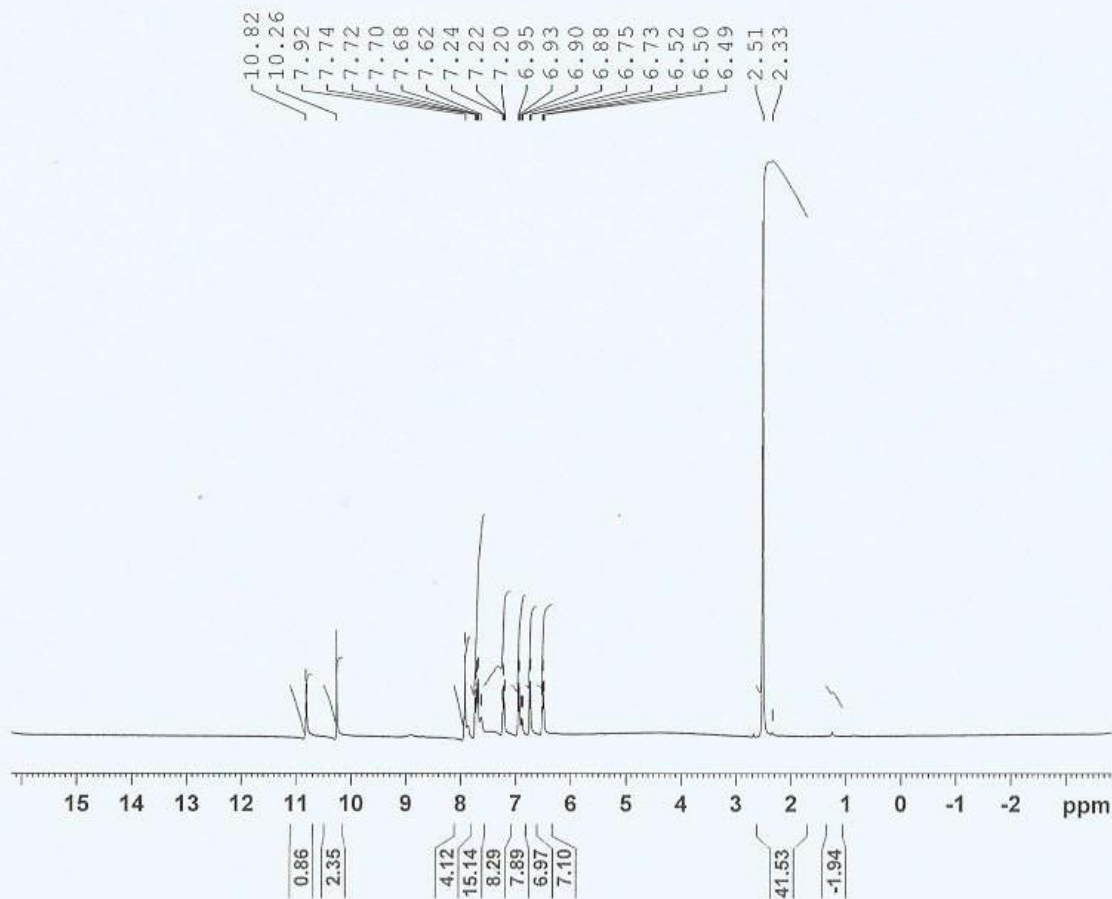

Current Data Parameters  
NAME Jul29-2017  
EXPNO 250  
PROCNO 1

F2 - Acquisition Parameters  
Date\_ 20170729  
Time 11.48  
INSTRUM spect  
PROBHD 5 mm PABBO BB/  
PULPROG zg30  
TD 65536  
SOLVENT DMSO  
NS 20  
DS 2  
SWH 8012.820 Hz  
FIDRES 0.122266 Hz  
AQ 4.0894465 sec  
RG 199.04  
DW 62.400 usec  
DE 6.50 usec  
TE 314.2 K  
D1 1.00000000 sec  
TDO 1

----- CHANNEL f1 -----  
SF01 400.1324710 MHz  
NUC1 1H  
P1 12.00 usec  
PLW1 22.00000000 W

F2 - Processing parameters  
SI 65536  
SF 400.1300000 MHz  
WDW EM  
SSB 0  
LB 0.30 Hz  
GB 0  
PC 1.00

Fig. S1: <sup>1</sup>H NMR of HSAln ligand.

SSA-3  
c13\_su DMSO {C:\nmr-data} Student 17

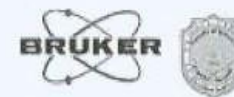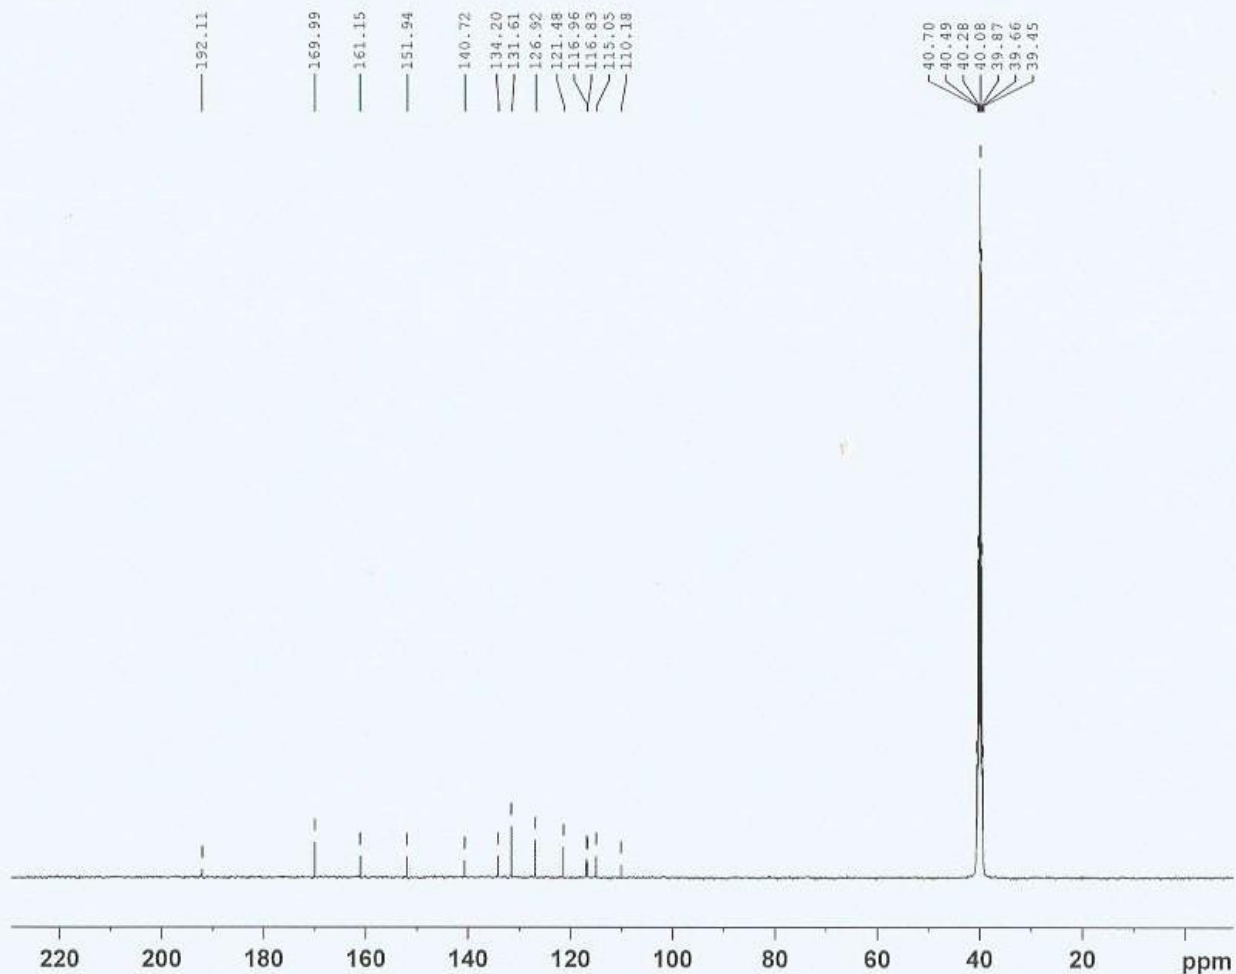

Current Data Parameters  
NAME Jul31-2017  
EXPNO 20  
PROCNO 1

F2 - Acquisition Parameters  
Date 20170731  
Time 10.46  
INSTRUM spect  
PROBHD 5 mm PABBO BB/  
PULPROG zgpg30  
TD 65536  
SOLVENT DMSO  
NS 1200  
DS 4  
SWH 24038.461 Hz  
FIDRES 0.366798 Hz  
AQ 1.3631488 sec  
RG 199.04  
DW 20.800 usec  
DE 6.50 usec  
TE 308.1 K  
D1 2.00000000 sec  
D11 0.03000000 sec  
TDO 1

==== CHANNEL f1 =====  
SFO1 100.6238364 MHz  
NUC1 13C  
P1 9.50 usec  
PLW1 56.00000000 W

==== CHANNEL f2 =====  
SFO2 400.1316005 MHz  
NUC2 1H  
CPDPRG[2] waltz16  
PCPD2 90.00 usec  
PLW2 22.00000000 W  
PLW12 0.41091001 W  
PLW13 0.33284000 W

F2 - Processing parameters  
SI 32768  
SF 100.6127690 MHz  
WDW EM  
SSB 0  
LB 6.00 Hz  
GB 0  
PC 1.40

Fig. S2:  $^{13}\text{C}$ NMR of HSaln ligand.

SSA-3  
c13\_su DMSO {C:\nmr-data} Student 17

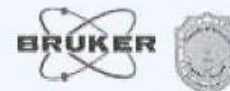

Current Data Parameters  
NAME Jul131-2017  
EXPNO 20  
PROCNO 1

F2 - Acquisition Parameters  
Date\_ 20170731  
Time\_ 10.46  
INSTRUM spect  
PROBHD 5 mm PABBO BB/  
PULPROG zgpg30  
TD 65536  
SOLVENT DMSO  
NS 1200  
DS 4  
SWH 24038.461 Hz  
FIDRES 0.366798 Hz  
AQ 1.3631488 sec  
RG 199.04  
DW 20.800 usec  
DE 6.50 usec  
TE 308.1 K  
D1 2.00000000 sec  
D11 0.03000000 sec  
TD0 1

===== CHANNEL f1 =====  
SFO1 100.6238364 MHz  
NUC1 13C  
P1 9.50 usec  
PLW1 56.00000000 W

===== CHANNEL f2 =====  
SFO2 400.1316005 MHz  
NUC2 1H  
CPDPRG[2] waltz16  
PCPD2 90.00 usec  
PLW2 22.00000000 W  
PLW12 0.41091001 W  
PLW13 0.33284000 W

F2 - Processing parameters  
SI 32768  
SF 100.6127690 MHz  
WDW EM  
SSB 0  
LB 6.00 Hz  
GB 0  
PC 1.40

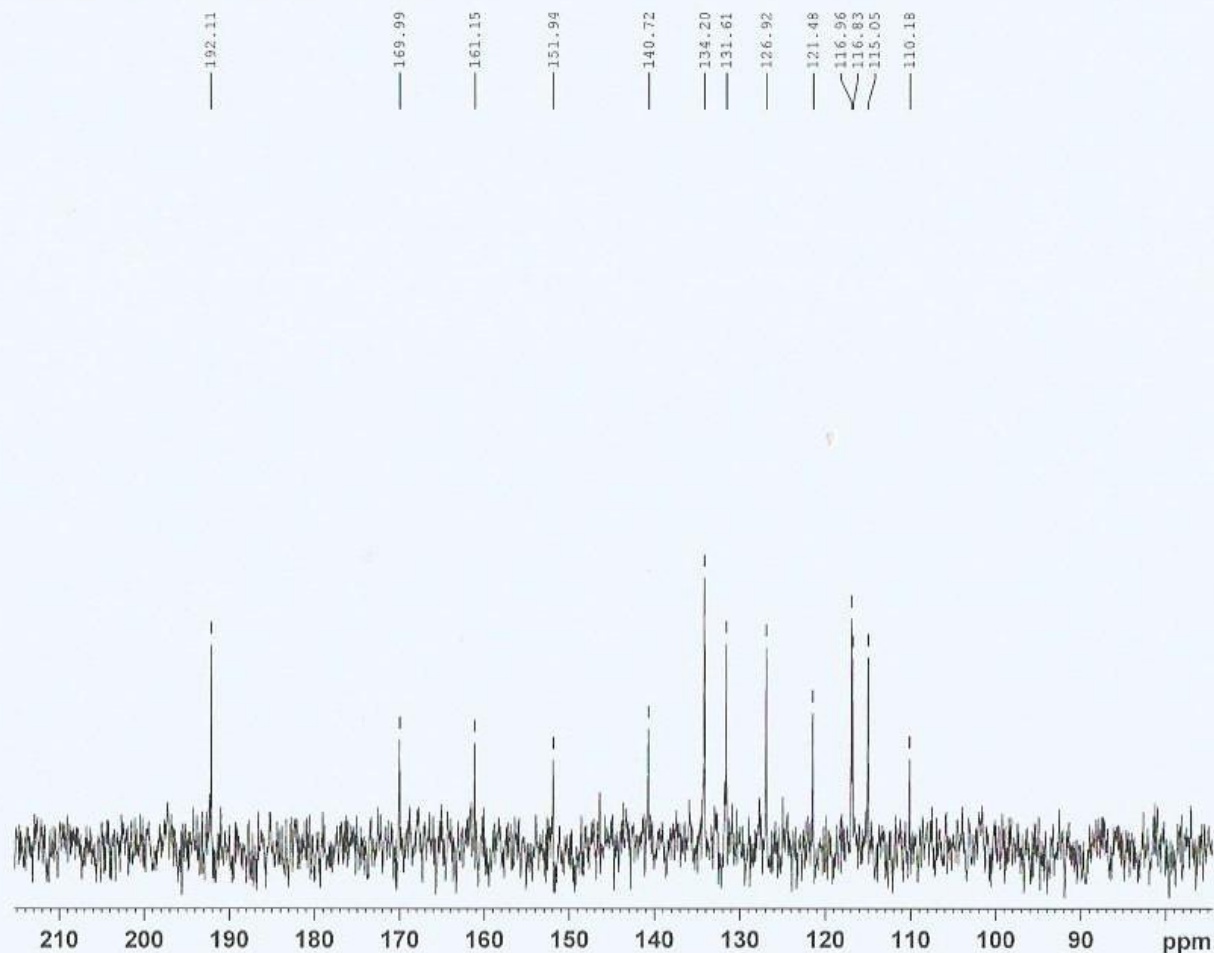

Fig. S3:  $^{13}\text{C}$ NMR of HSAln zoom in the aromatic region.

SSA-3  
dept135\_su DMSO (C:\nmr-data) Student 17

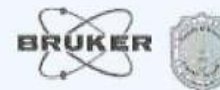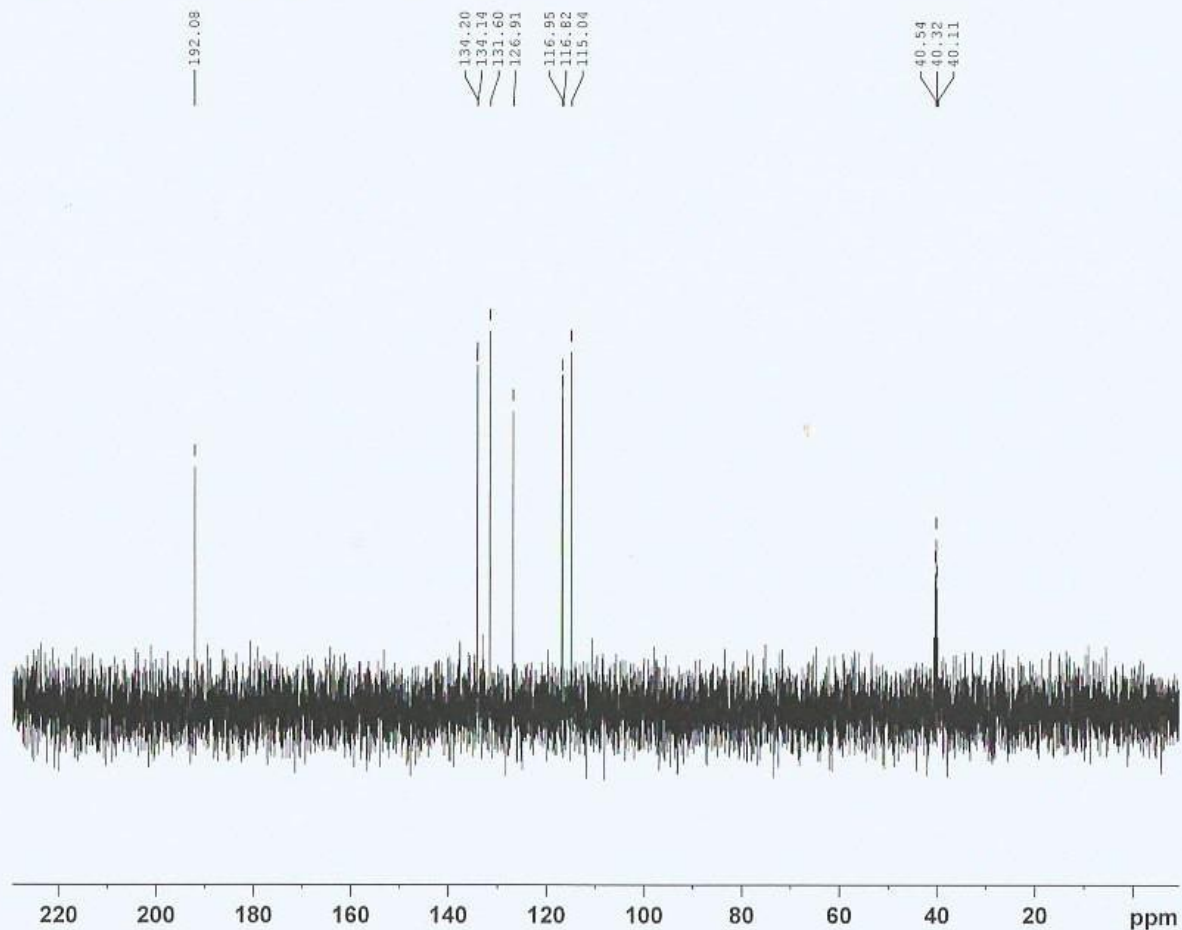

Current Data Parameters  
NAME Jul131-2017  
EXPNO 21  
PROCNO 1

F2 - Acquisition Parameters  
Date\_ 20170731  
Time 11.01  
INSTRUM spect  
PROBHD 5 mm PABBO BB/  
PULPROG deptsp135  
TD 65536  
SOLVENT DMSO  
NS 256  
DS 4  
SWH 24038.461 Hz  
FIDRES 0.366798 Hz  
AQ 1.3631488 sec  
RG 199.04  
DW 20.800 usec  
DE 6.50 usec  
TE 308.2 K  
CNST2 145.0000000  
D1 2.00000000 sec  
D2 0.00344828 sec  
D12 0.00002000 sec  
TD0 1

----- CHANNEL f1 -----  
SF01 100.6238364 MHz  
NUC1 13C  
P1 9.50 usec  
P13 2000.00 usec  
PLW0 0 W  
PLW1 56.00000000 W  
SPNAM[5] Crp60comp.4  
SPOALS 0.500  
SPOFFS5 0 Hz  
SFWS 7.72189999 W

----- CHANNEL f2 -----  
SF02 400.1312797 MHz  
NUC2 1H  
CFDPRG[2] waltz16  
P3 12.30 usec  
P4 24.60 usec  
PCPD2 90.00 usec  
PLW2 22.00000000 W  
PLW12 0.41091001 W

F2 - Processing parameters  
SI 32768  
SF 100.6127690 MHz  
WDW EM  
SSB 0  
LB 1.00 Hz  
GB 0  
PC 1.40

Fig. S4:  $^{135}\text{C}$  Dept CNMR of HSaln ligand.



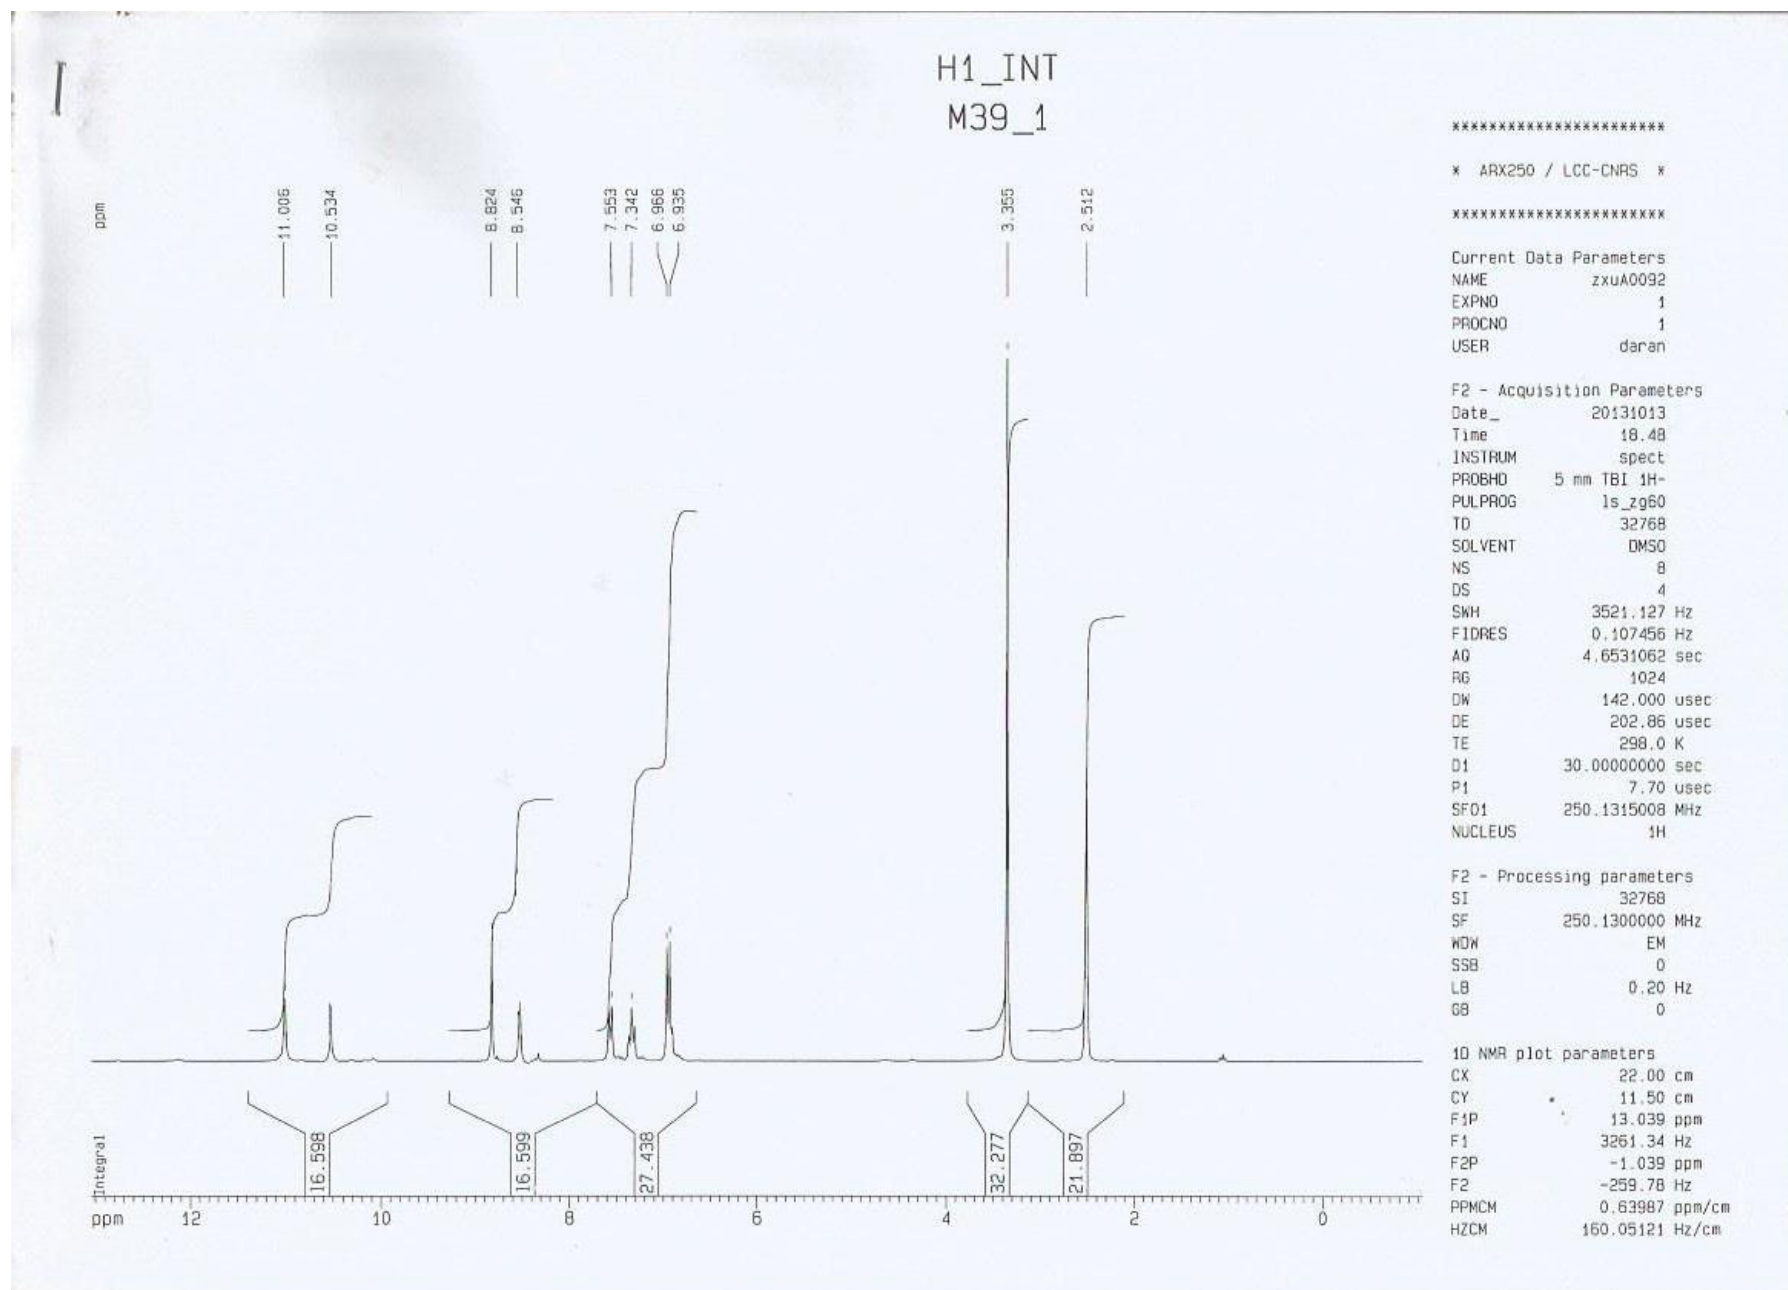

Fig. S5:  $^1\text{H}$ NMR of  $\text{MoO}_2\text{Saln}$  complex.

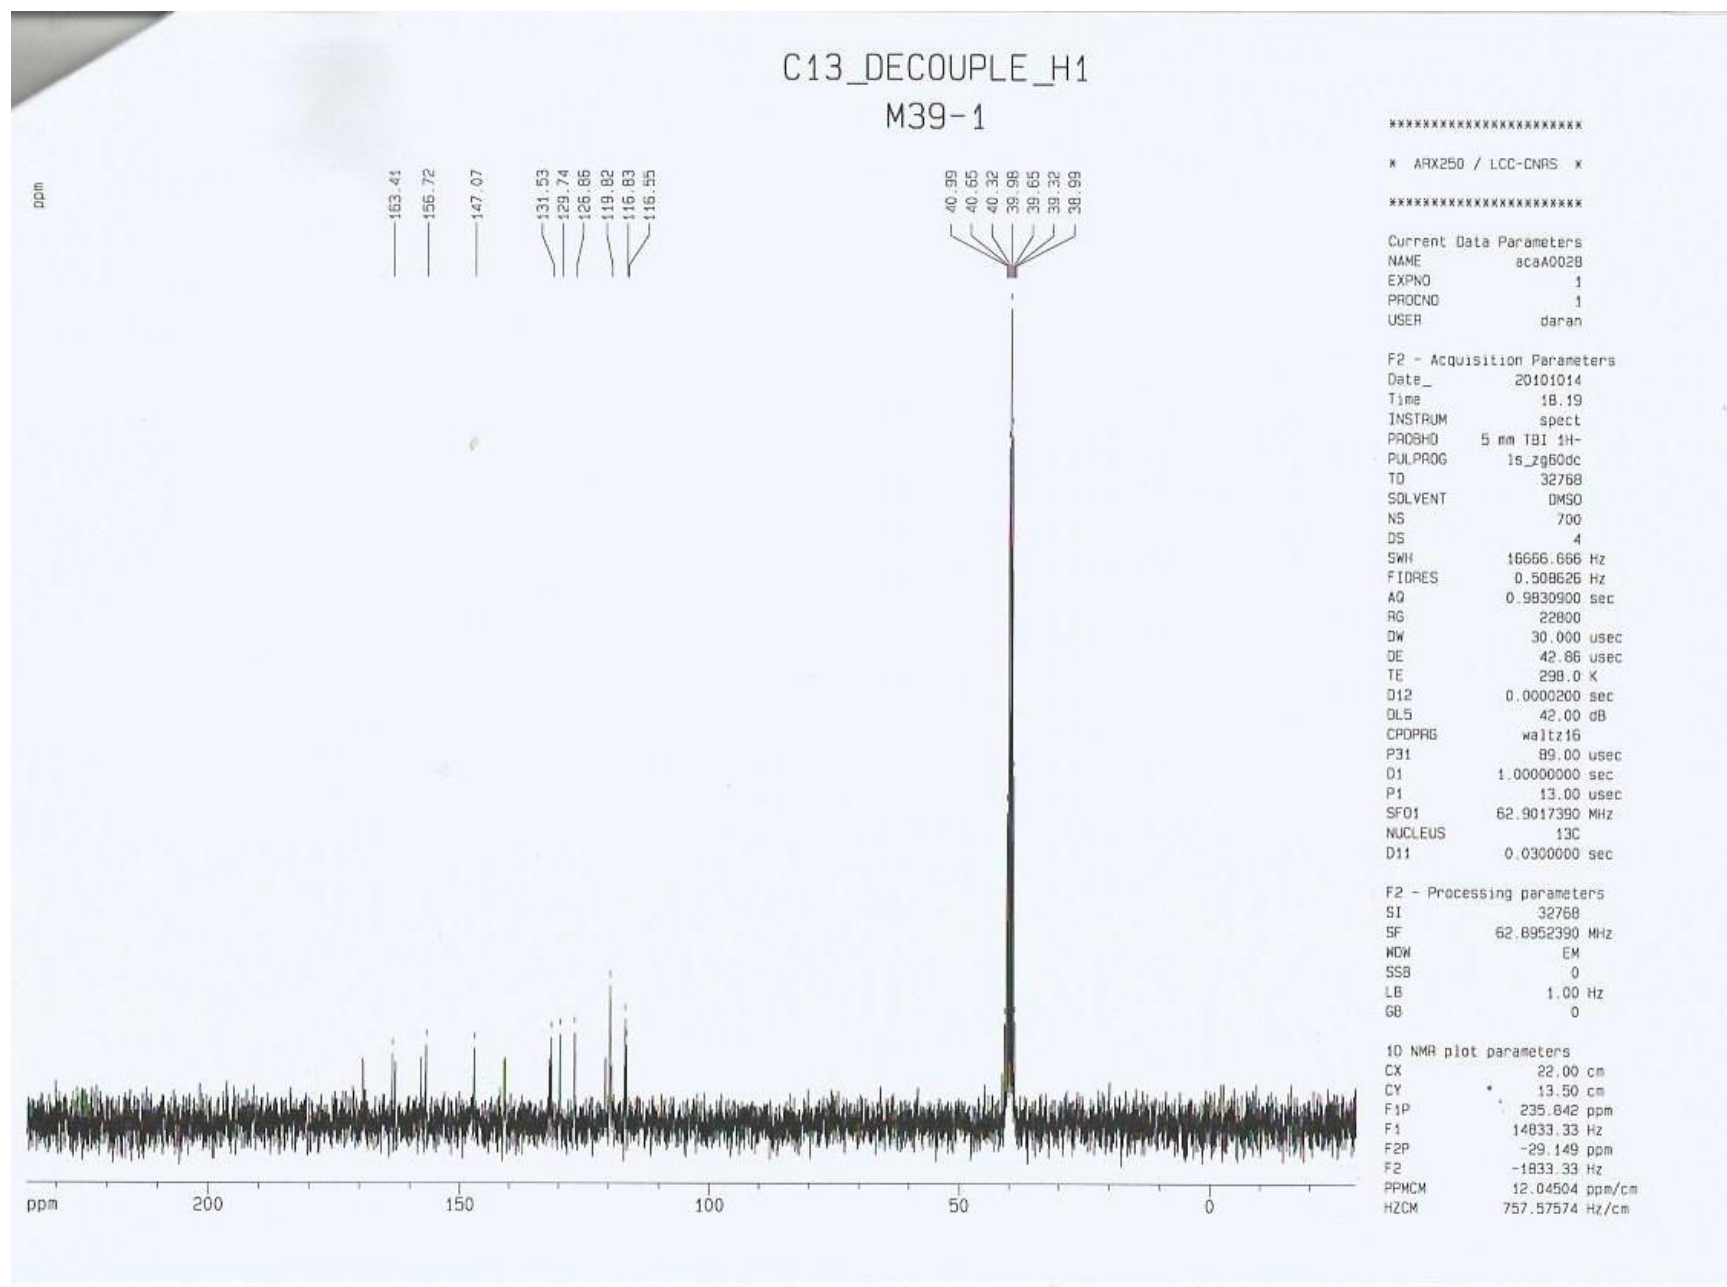

Fig. S6:  $^{13}\text{C}$ NMR of  $\text{MoO}_2\text{Saln}$  complex.



UO2-SSA  
proton\_su DMSO {C:\nmr-data} Student 8

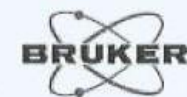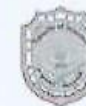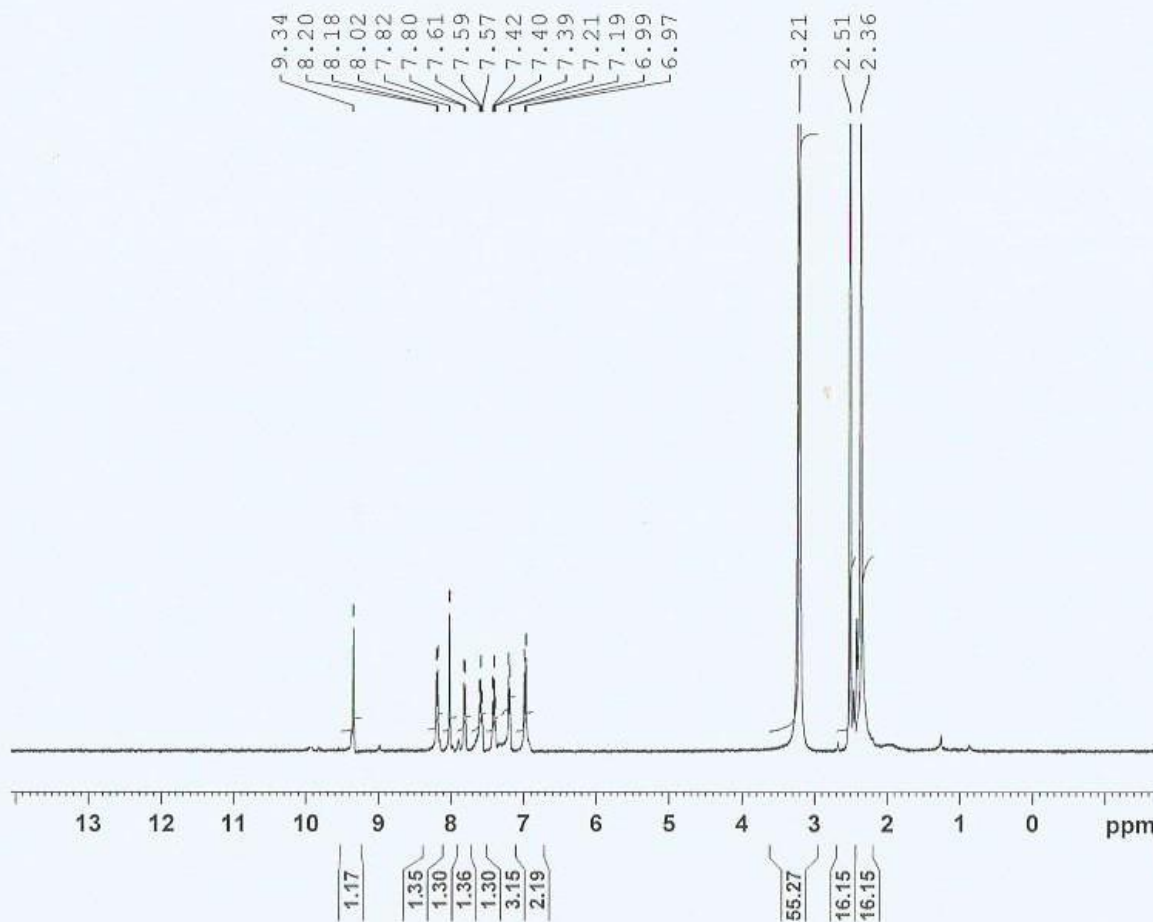

Current Data Parameters  
NAME Feb04-2018  
EXPNO 250  
PROCNO 1

F2 - Acquisition Parameters  
Date\_ 20180205  
Time 9.25  
INSTRUM spect  
PROBHD 5 mm PABBO BS/  
PULPROG zg30  
TD 65536  
SOLVENT DMSO  
NS 50  
DS 2  
SWH 8012.820 Hz  
FIDRES 0.122266 Hz  
AQ 4.0894465 sec  
RG 199.04  
DW 62.400 usec  
DE 6.50 usec  
TE 323.2 K  
D1 1.00000000 sec  
TDO 1

==== CHANNEL f1 =====  
SFO1 400.1324710 MHz  
NUC1 1H  
P1 12.00 usec  
PLW1 22.00000000 W

F2 - Processing parameters  
SI 65536  
SF 400.1300000 MHz  
WDW EM  
SSB 0  
LB 0.30 Hz  
GB 0  
PC 1.00

Fig. S7: <sup>1</sup>H NMR of UO<sub>2</sub>Saln complex.

Zn-ssA  
 c13\_su DMSO (C:\nmr-data) Student 10

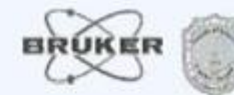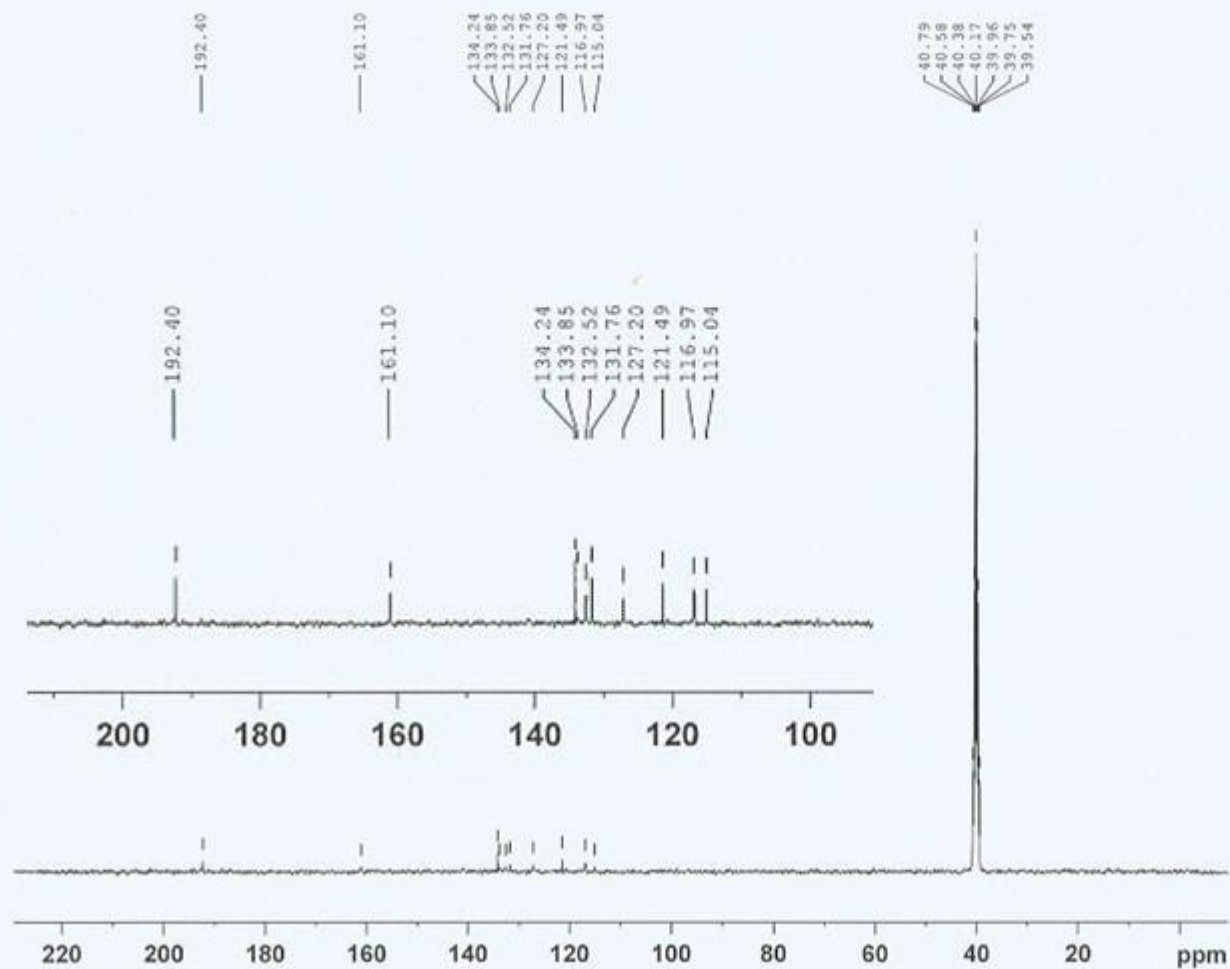

40.79  
 40.58  
 40.38  
 40.17  
 39.96  
 39.75  
 39.54

Current Data Parameters  
 NAME Jul10-2017  
 EXPNO 80  
 PROCNO 1

F2 - Acquisition Parameters  
 Date\_ 20170710  
 Time 12.12  
 INSTRUM spect  
 PROBHD 5 mm PABBO BB/  
 PULPROG zgpg30  
 TD 65536  
 SOLVENT DMSO  
 NS 512  
 DS 4  
 SWH 24038.461 Hz  
 FIDRES 0.366798 Hz  
 AQ 1.3631488 sec  
 RG 199.04  
 DW 20.800 usec  
 DE 6.50 usec  
 TE 323.2 K  
 D1 2.00000000 sec  
 D11 0.03000000 sec  
 TDO 1

===== CHANNEL f1 =====  
 SFO1 100.6238364 MHz  
 NUC1 13C  
 P1 9.50 usec  
 PLW1 56.00000000 W

===== CHANNEL f2 =====  
 SFO2 400.1316005 MHz  
 NUC2 1H  
 CPDPRG[2] waltz16  
 PCPD2 90.00 usec  
 PLW2 22.00000000 W  
 PLW12 0.41091001 W  
 PLW13 0.33284000 W

F2 - Processing parameters  
 SI 32768  
 SF 100.6127690 MHz  
 WDW EM  
 SSB 0  
 LB 6.00 Hz  
 GB 0  
 PC 1.40

Fig. S8: <sup>13</sup>CNMR of UO<sub>2</sub>Saln complex.

ZN-SSA  
dept135\_su DMSO {C:\nmr-data} Student 4

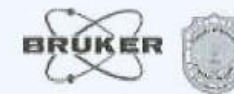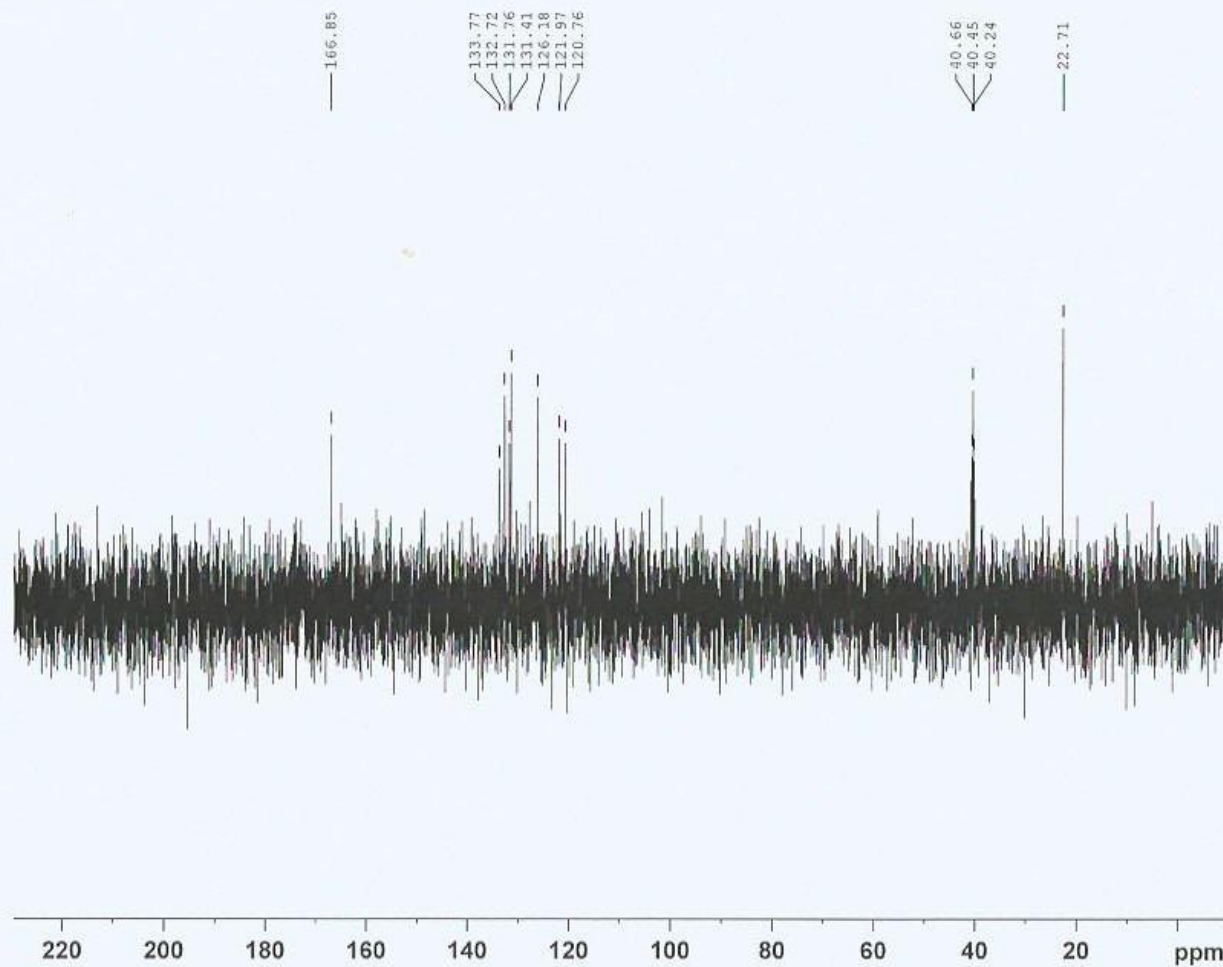

Current Data Parameters  
NAME Sep10-2017  
EXPNO 150  
PROCNO 1

F2 - Acquisition Parameters  
Date\_ 20170910  
Time\_ 23.00  
INSTRUM spect  
PROBHD 5 mm PABBO BB/  
PULPROG deptsp135  
TD 65536  
SOLVENT DMSO  
NS 256  
DS 4  
SWH 24038.461 Hz  
FIDRES 0.366798 Hz  
AQ 1.3631488 sec  
RG 199.04  
DW 20.800 usec  
DE 6.50 usec  
TE 323.2 K  
CNST2 145.0000000  
D1 2.0000000 sec  
D2 0.00344828 sec  
D12 0.00002000 sec  
TD0 1

===== CHANNEL f1 =====  
SFO1 100.6238364 MHz  
NUC1 13C  
P1 9.50 usec  
P13 2000.00 usec  
PLW0 0 W  
PLW1 56.00000000 W  
SPNAM[5] Crp60comp.4  
SFOAL5 0.500  
SPOFF5 0 Hz  
SPW5 7.72189999 W

===== CHANNEL f2 =====  
SFO2 400.1312797 MHz  
NUC2 1H  
CPDPRG[2] waltz16  
P3 12.30 usec  
P4 24.60 usec  
PCPD2 90.00 usec  
PLW2 22.00000000 W  
PLW12 0.41091001 W

F2 - Processing parameters  
SI 32768  
SF 100.6127690 MHz  
WDW EM  
SSB 0  
LB 1.00 Hz  
GB 0  
PC 1.40

Fig. S9:  $^{135}\text{C}$  Dept CNMR of  $\text{UO}_2\text{Saln}$  complex.

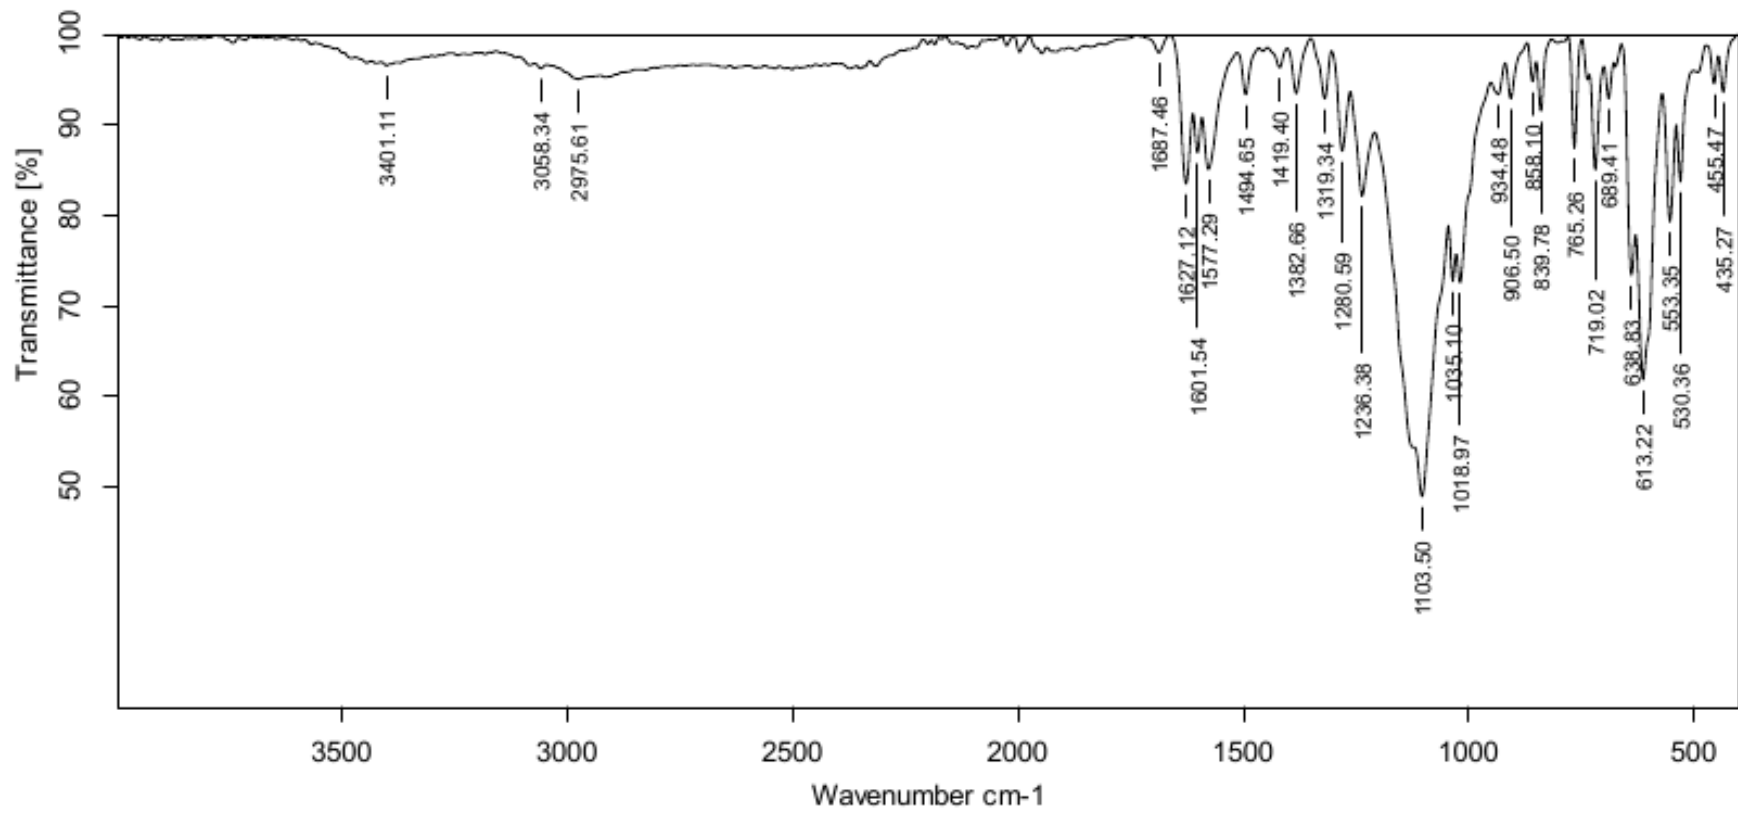

Fig. S10: IR spectra of HSaln ligand.

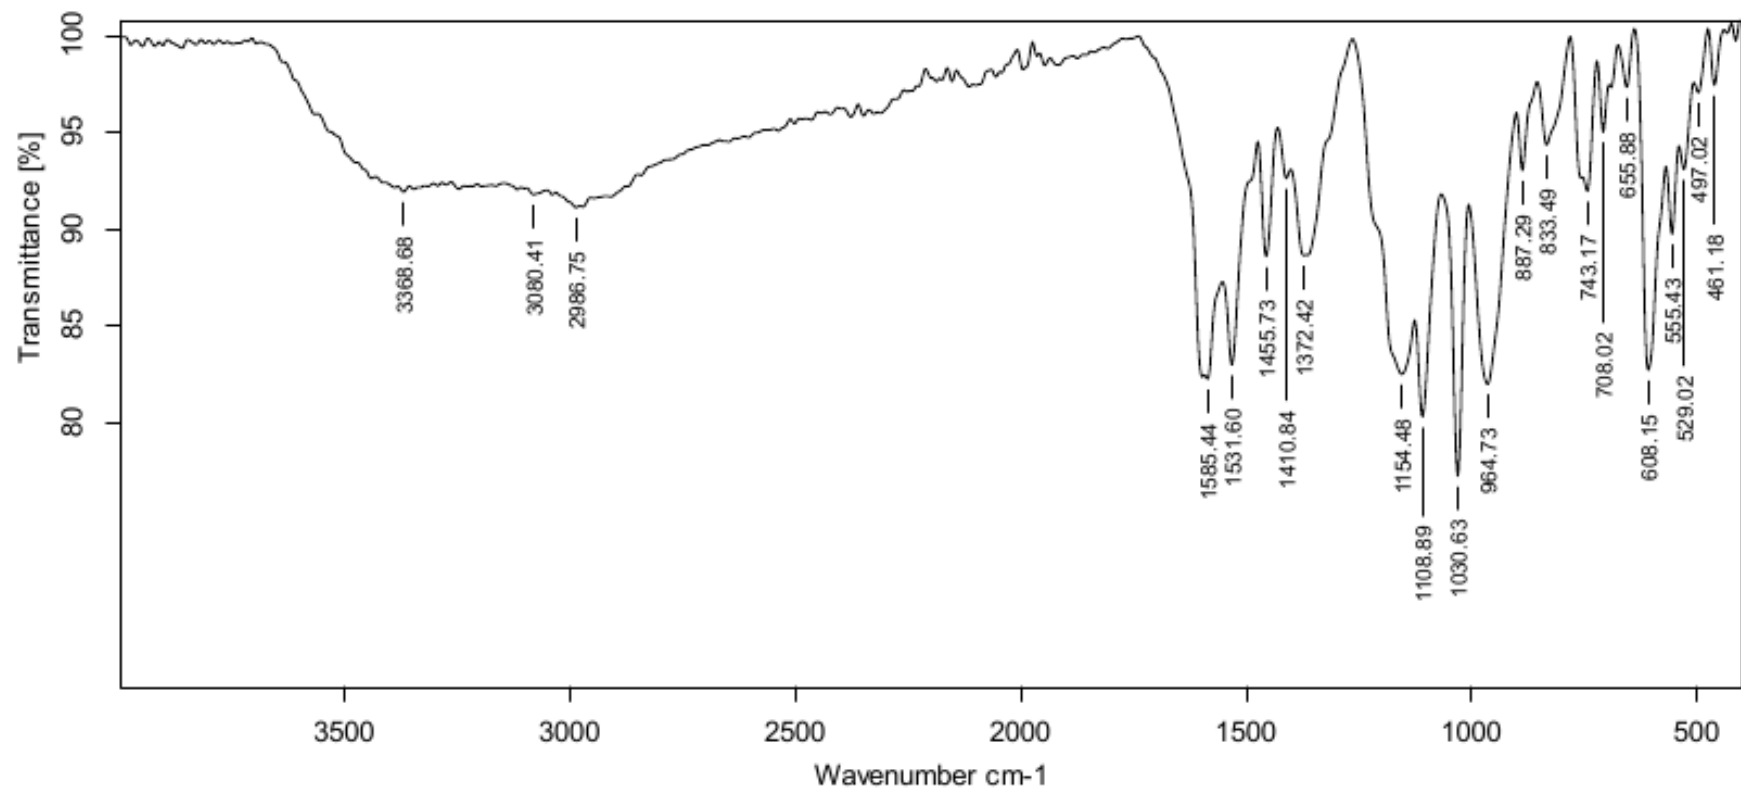

Fig. S11: IR spectra of VOSalN complex.

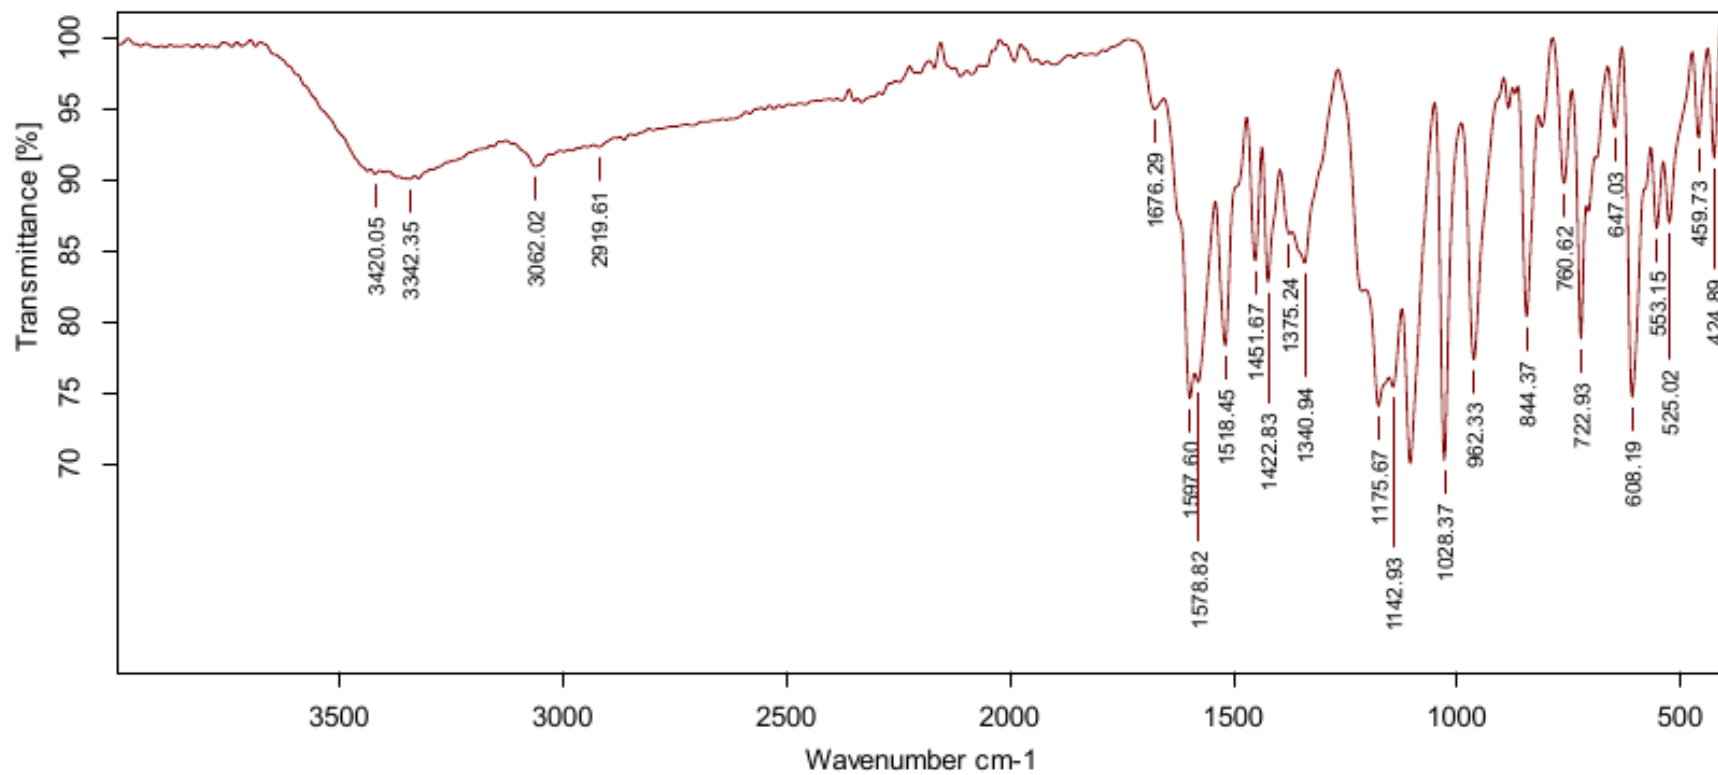

Fig. S12: IR spectra of VOSaln-Ph complex.



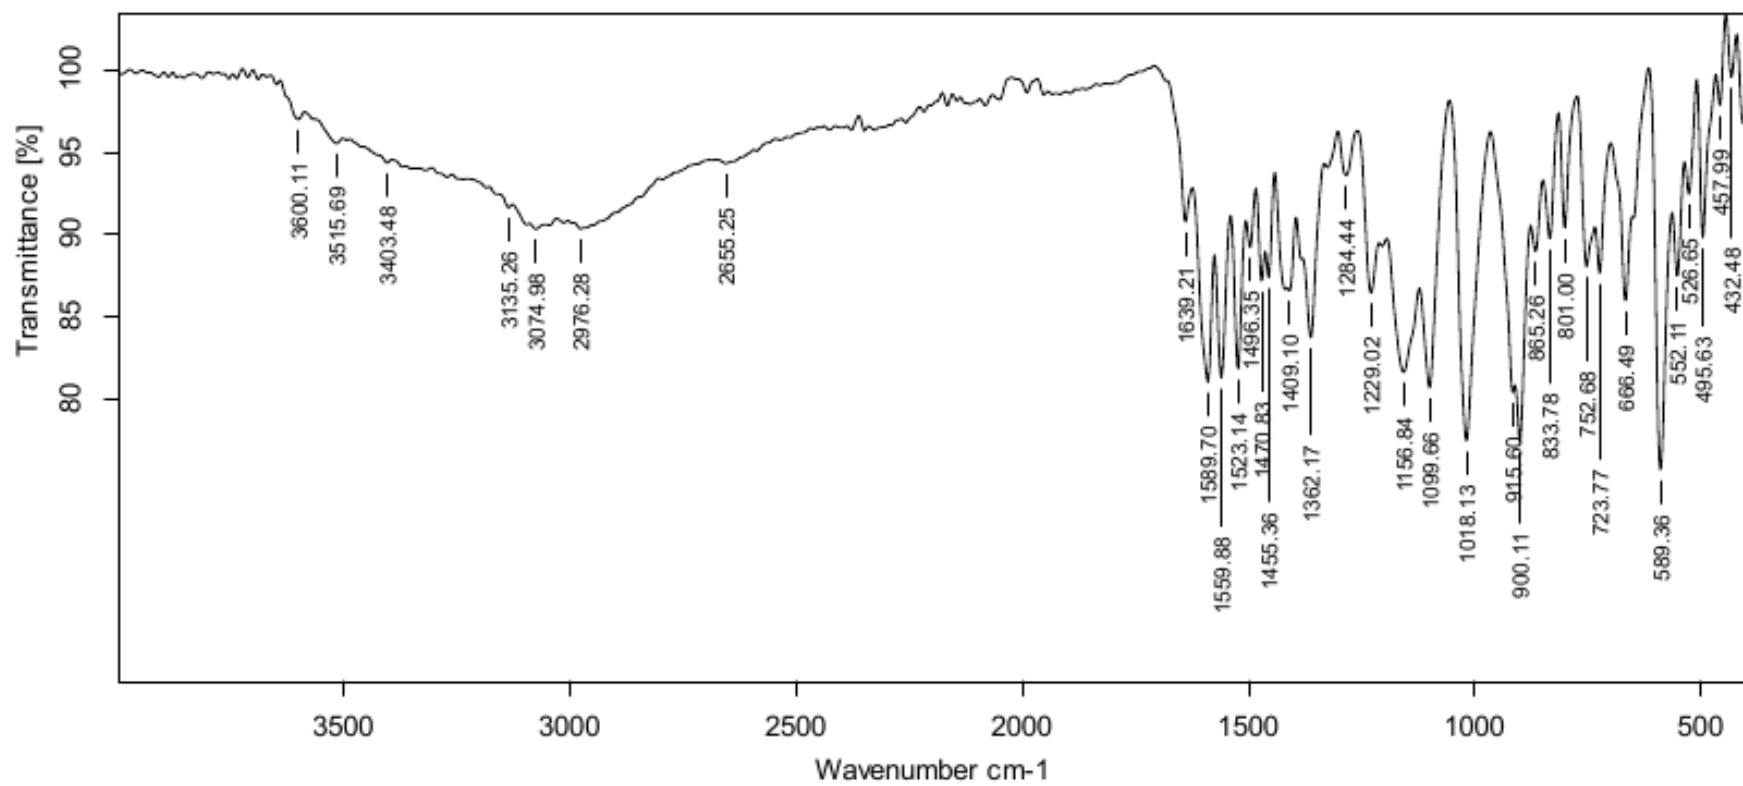

Fig. S13: IR spectra of UO<sub>2</sub>Saln complex.

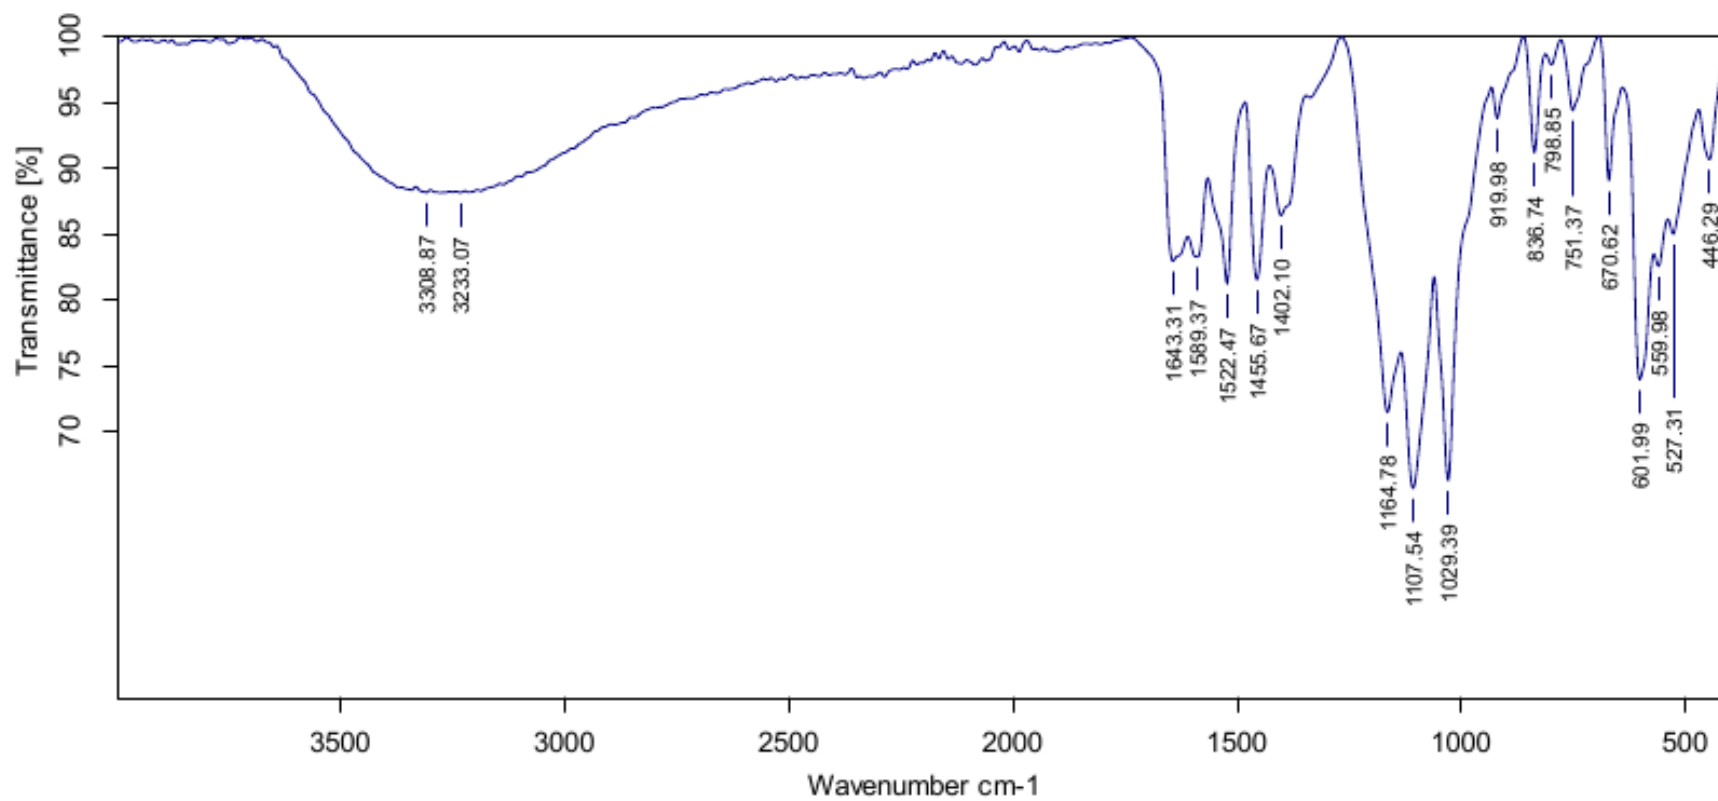

Fig. S14: IR spectra of MnSaln complex.

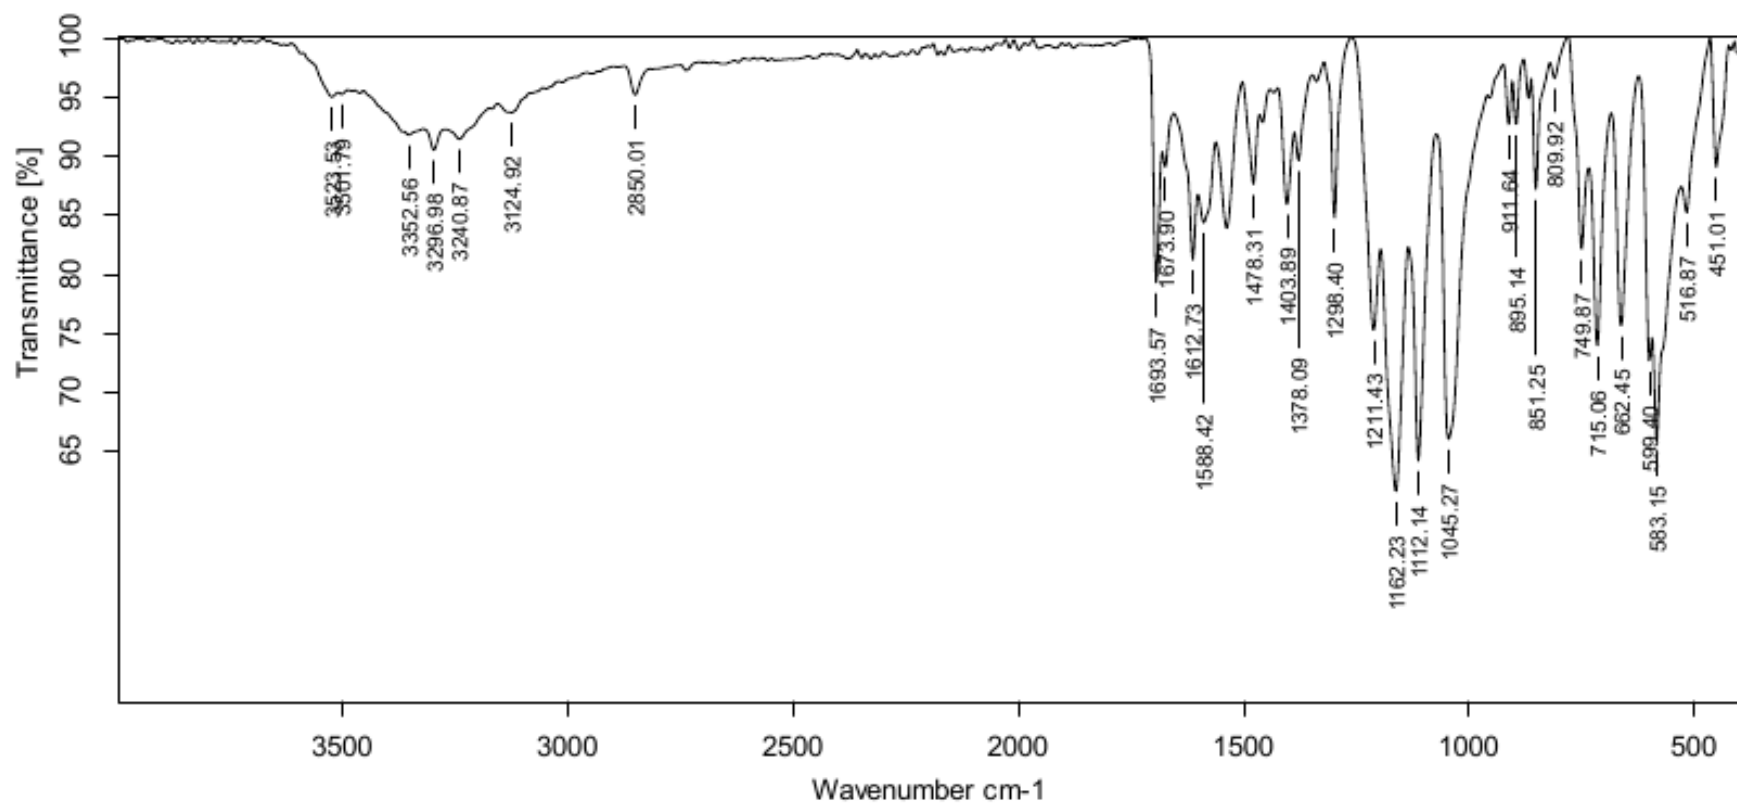

Fig. S15: IR spectra of MoO<sub>2</sub>Saln complex.

MS (EI, 70 eV)

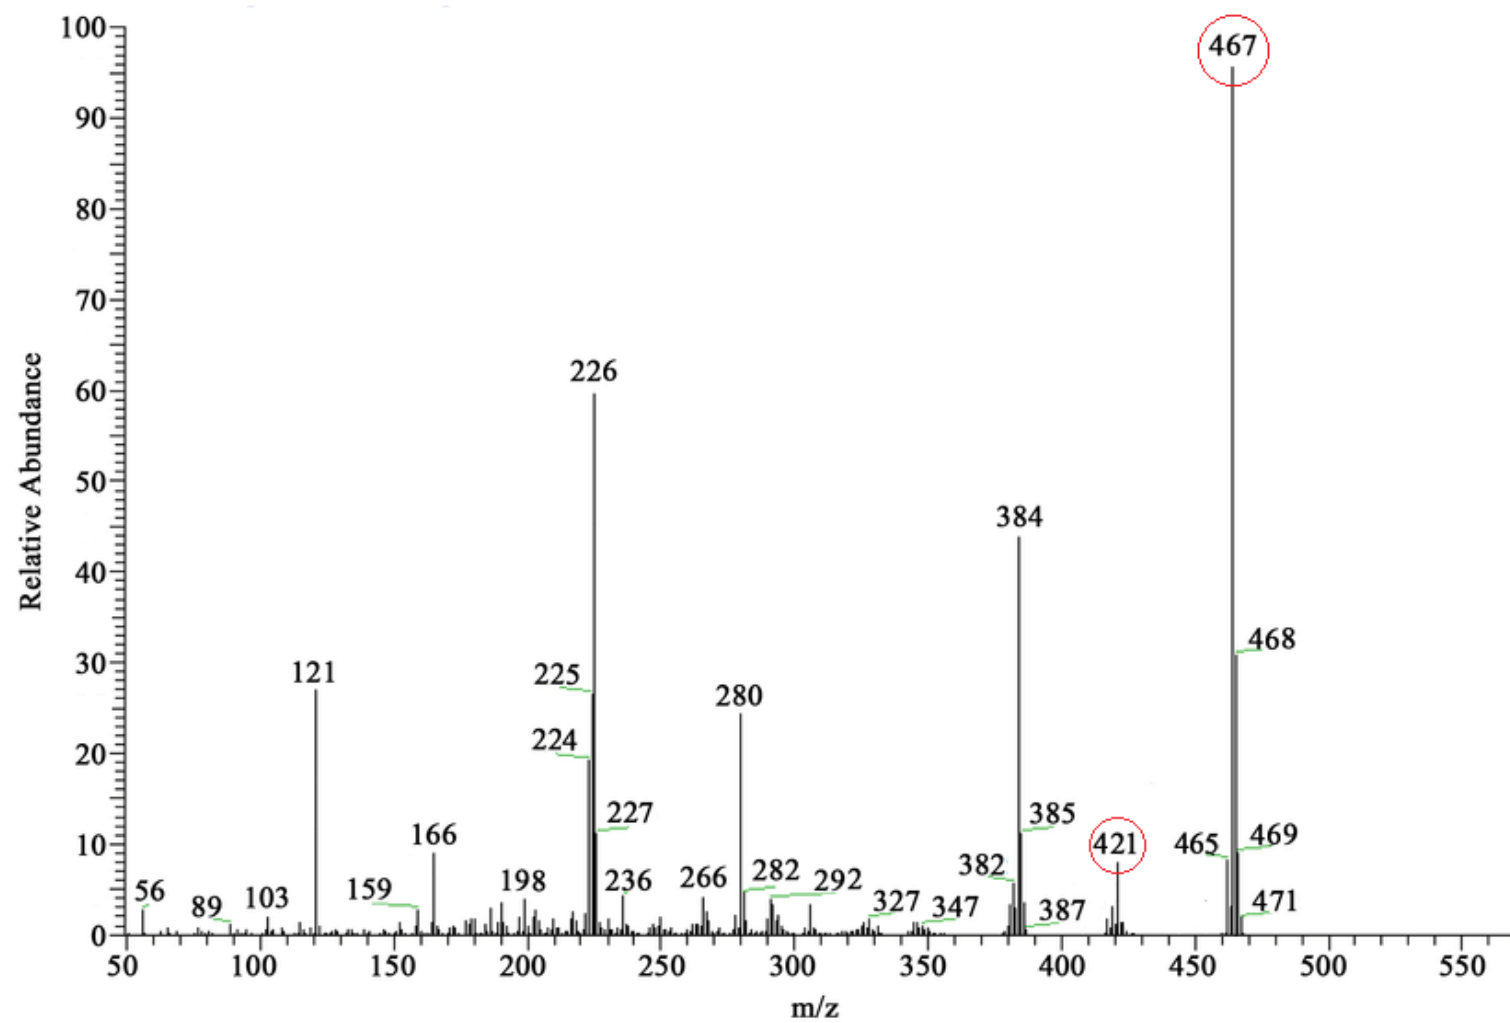

Fig. S16: MS of VOSaln complex.

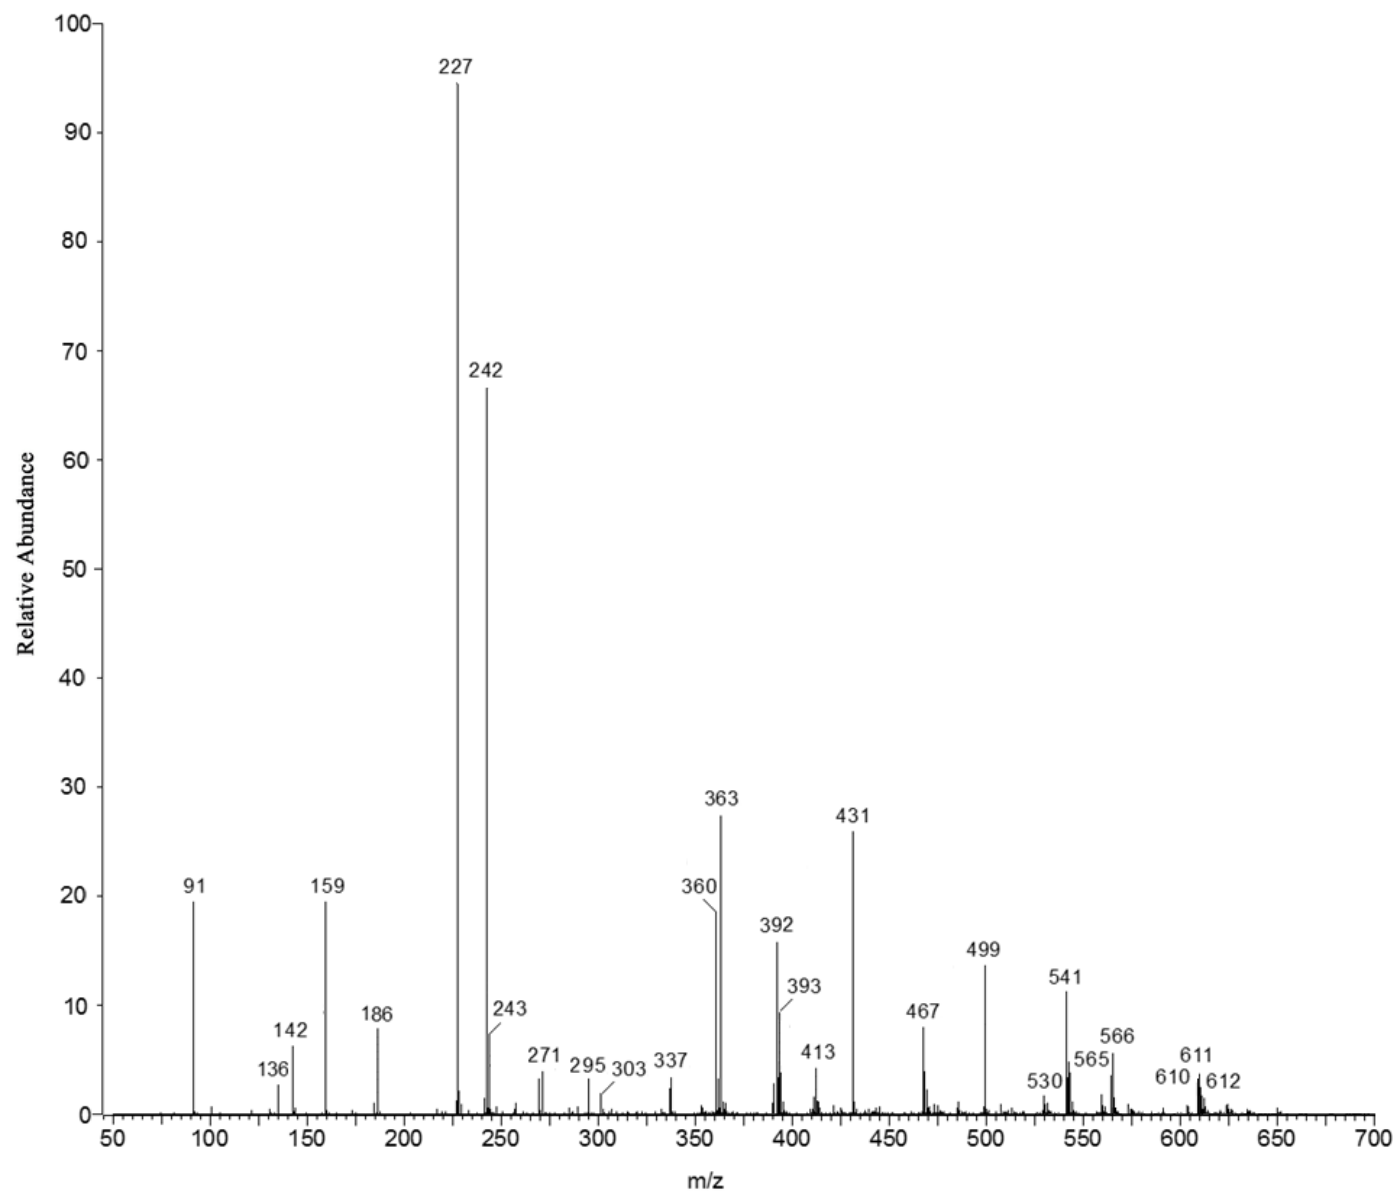

Fig. S17: MS of VOSaln-Ph complex.

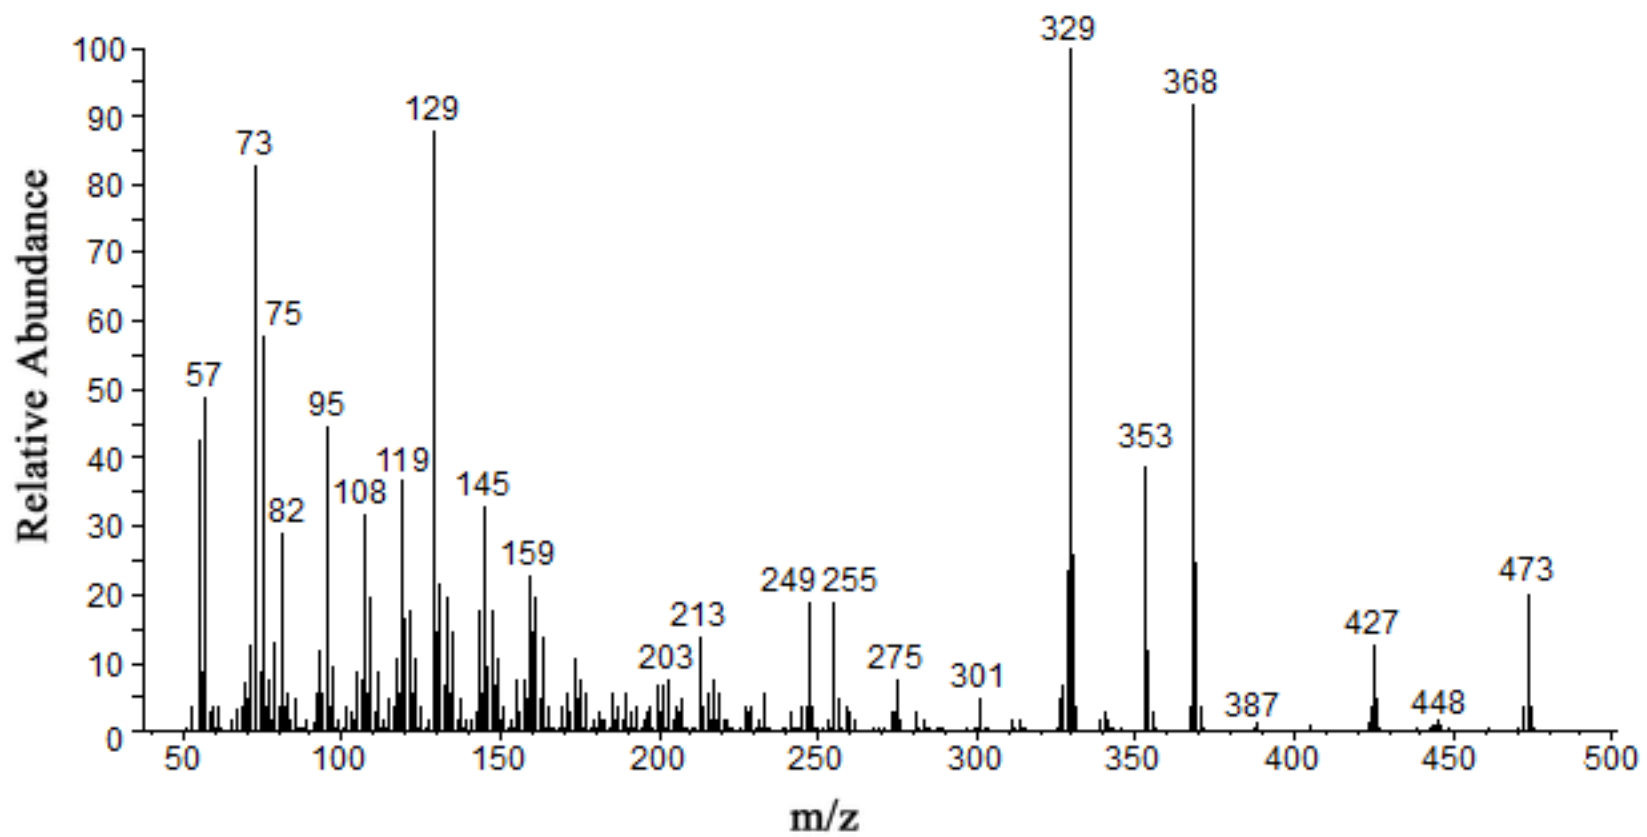

Fig. S18: MS of MnSaln complex.



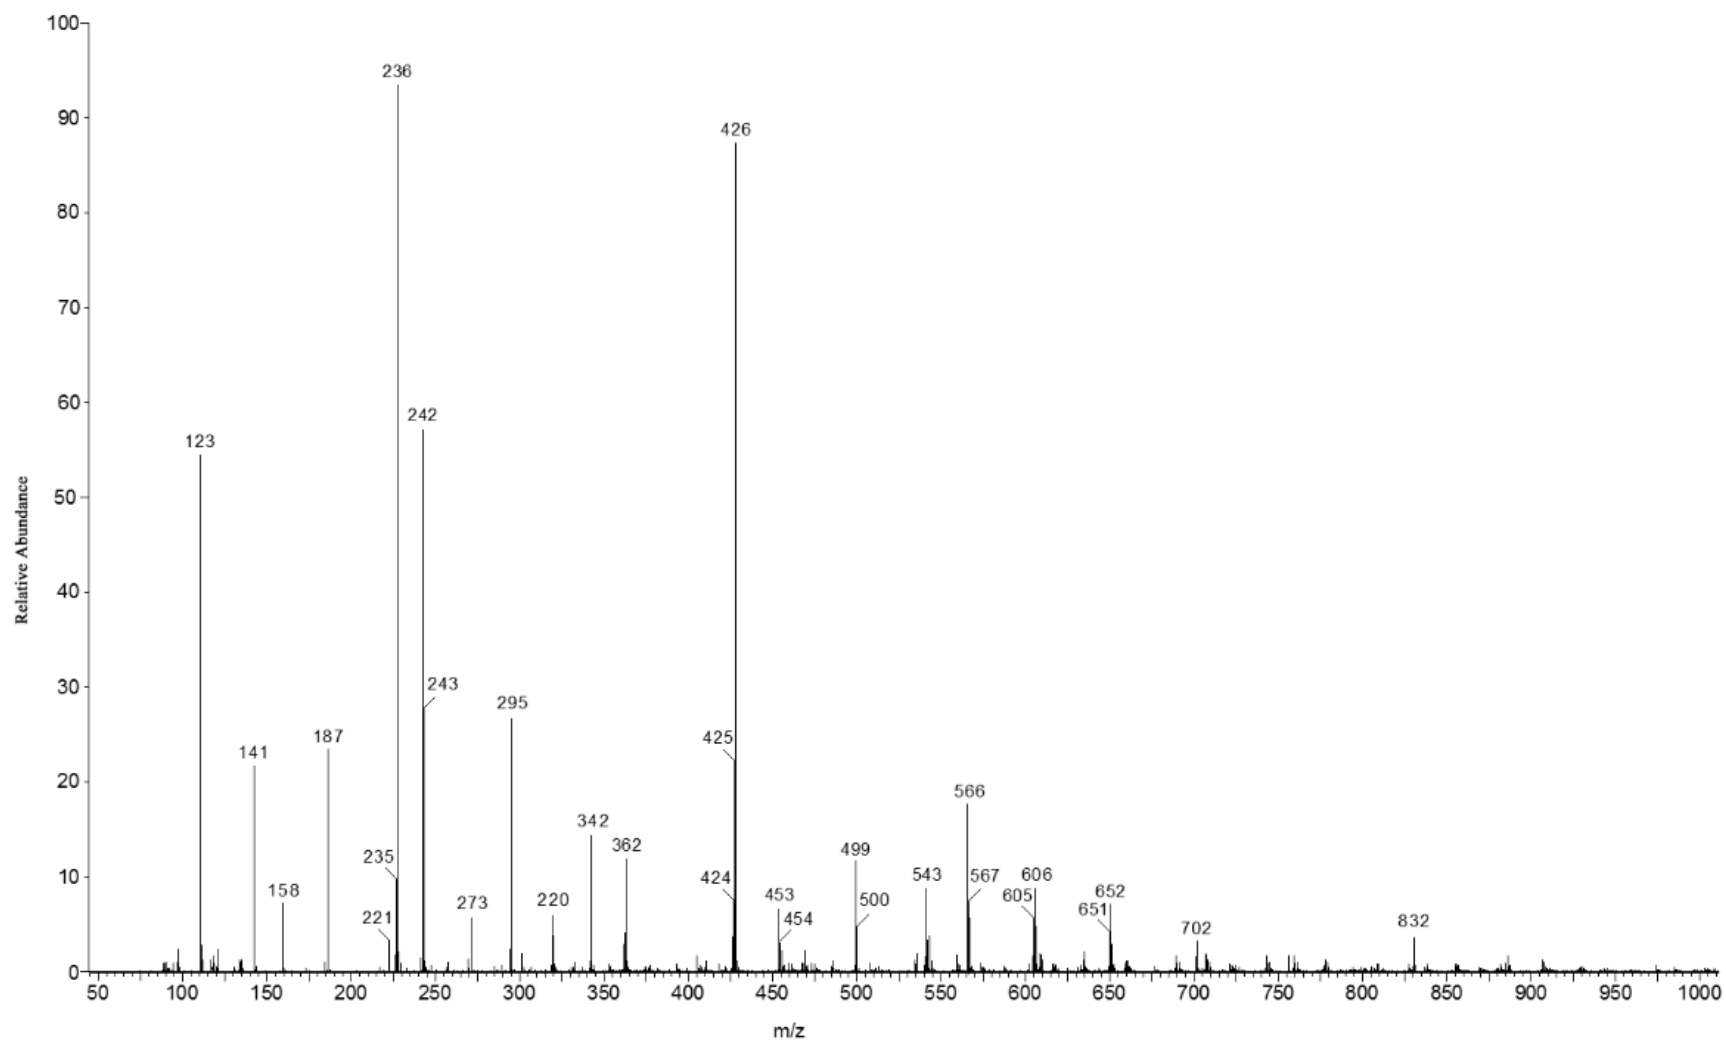

Fig. S19: MS of  $\text{UO}_2\text{Saln}$  complex.

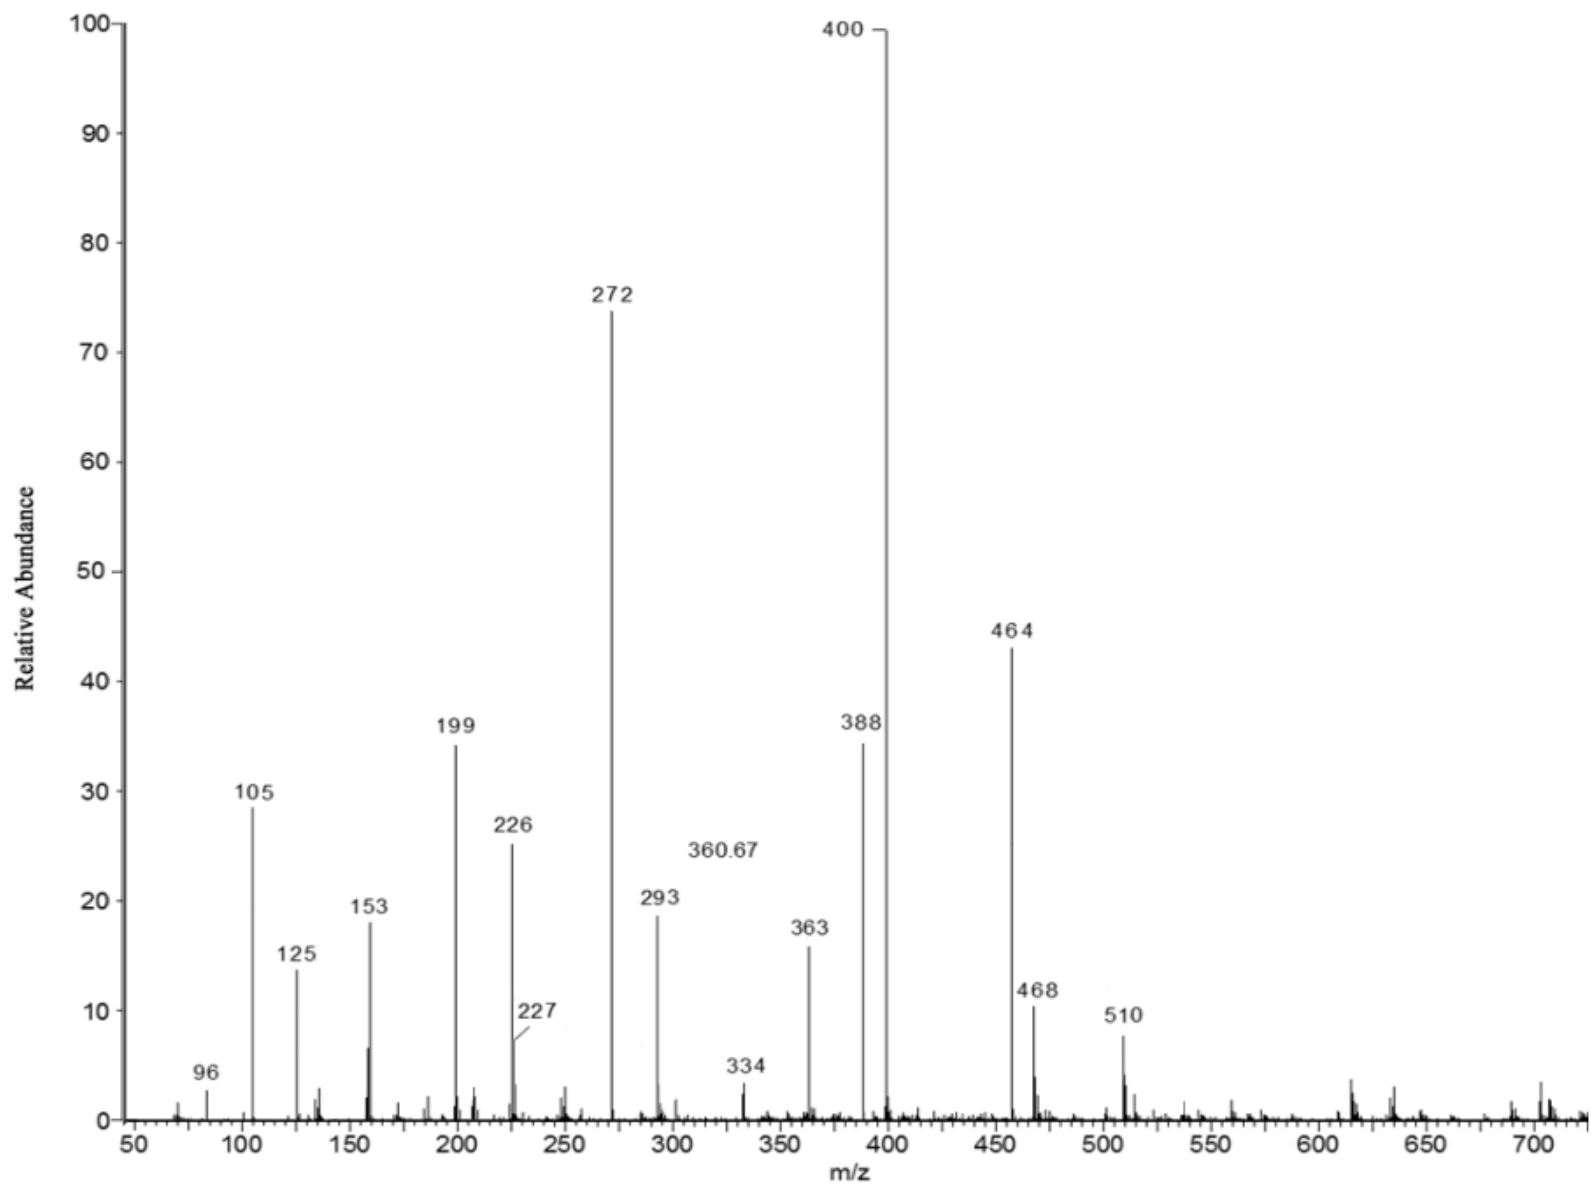

Fig. S20: MS of MoO<sub>2</sub>Saln complex.

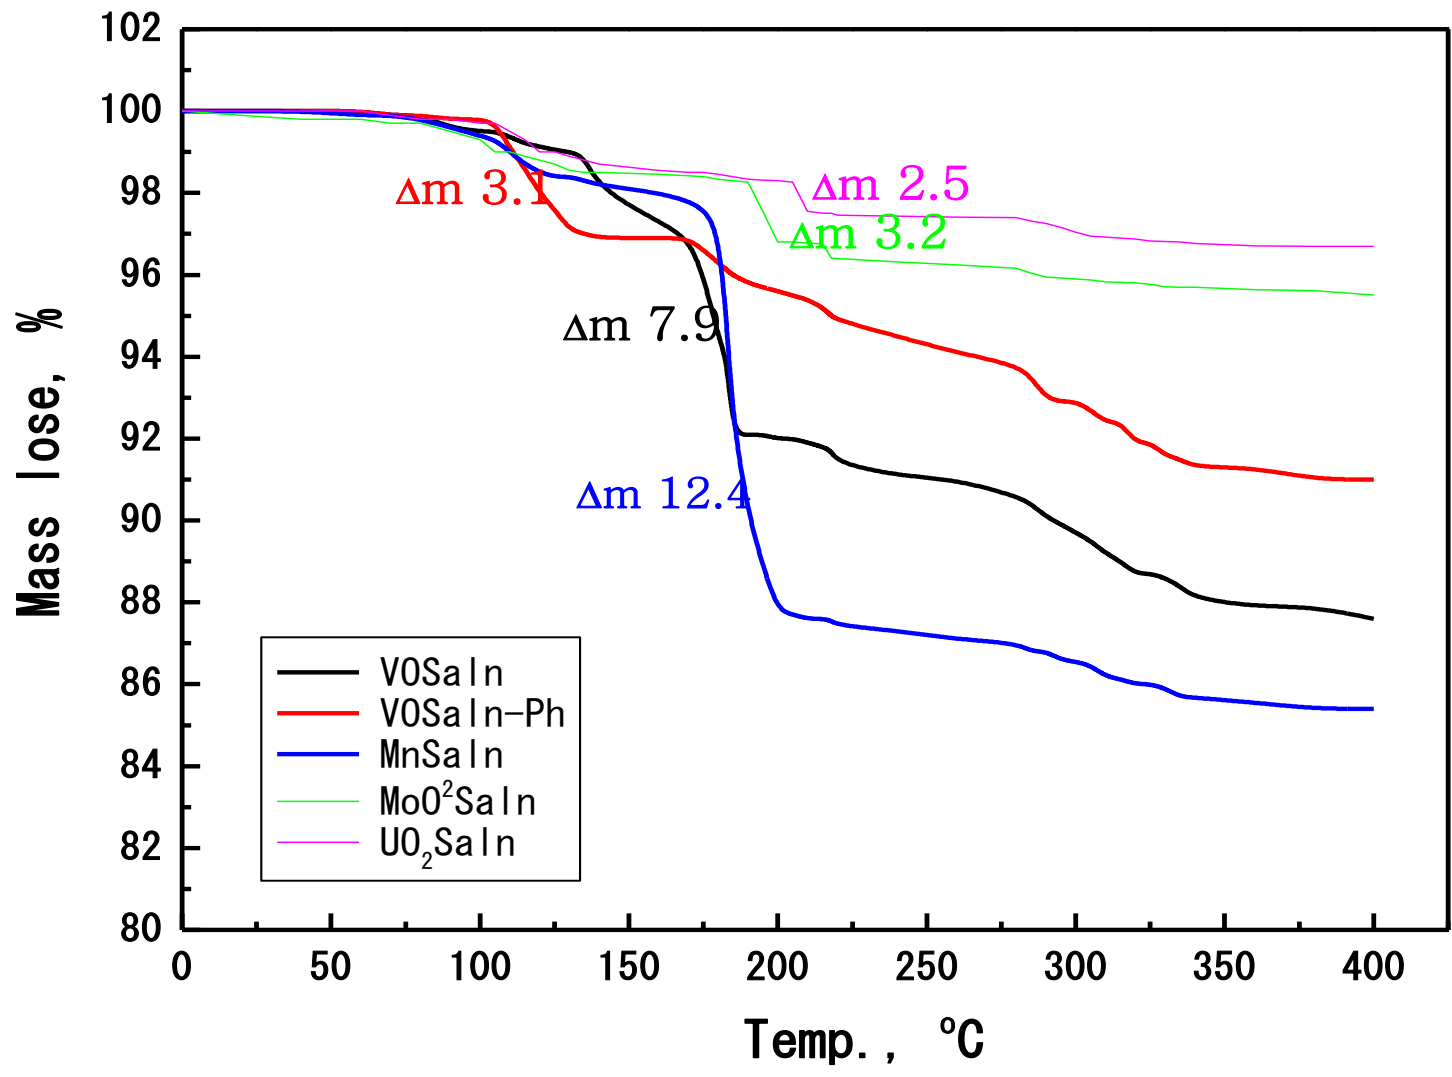

Fig. S21: TGA of MSaln complexes.

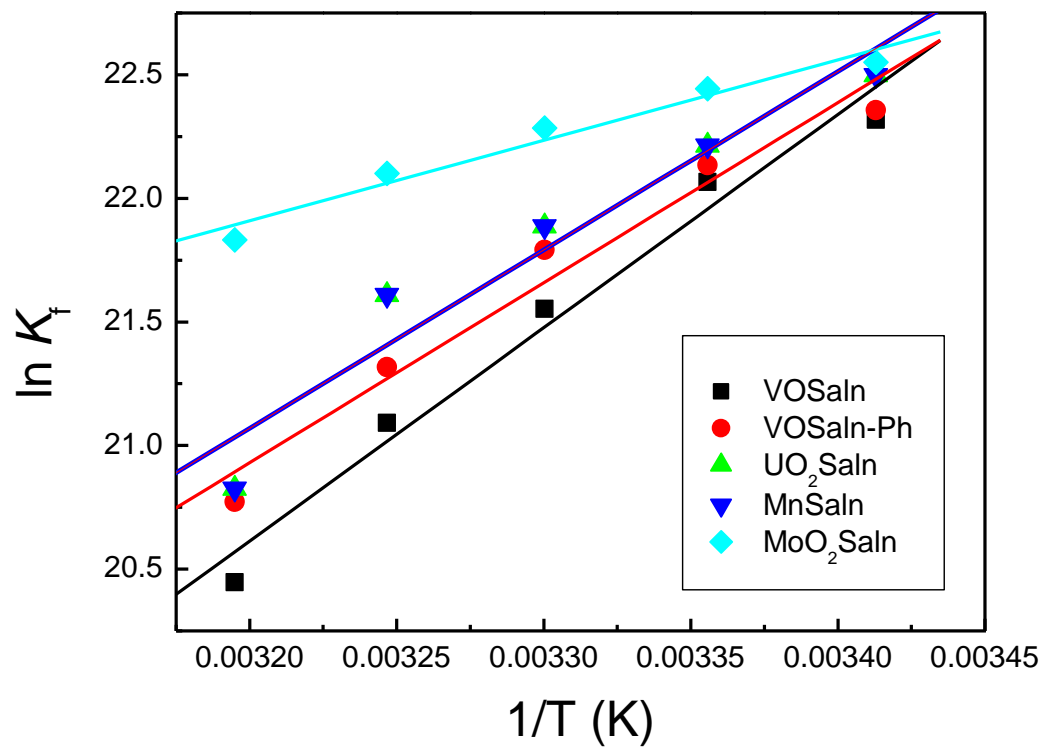

Fig. S22. Determination of thermodynamic parameters of MSalIn complexes formation from  $\ln K_f$  values.
